# Supplementary material for: Frontoparietal pattern similarity analyses of cognitive control in monozygotic twins
Source: PubMed Central journal article supplement — Neuroimage. Author manuscript; Available in PMC 2022 Nov 1. (PMC8958982; doi:10.1016/j.neuroimage.2021.118415), 2021-07-20

## S.1 Parcels Table

### FPN34 Parcel Set

| Parcel Number | Hemisphere | Network                    | ROI         | X   | Y   | Z  |
|---------------|------------|----------------------------|-------------|-----|-----|----|
| 22            | Left       | Visual                     | 22          | -19 | -65 | 7  |
| 77            | Left       | Dorsal Attention           | Post_9      | -33 | -46 | 41 |
| 78            | Left       | Dorsal Attention           | Post_10     | -29 | -58 | 50 |
| 86            | Left       | Dorsal Attention           | FEF_1       | -40 | -3  | 51 |
| 87            | Left       | Dorsal Attention           | FEF_2       | -25 | -1  | 55 |
| 91            | Left       | Dorsal Attention           | PrCv_2      | -50 | 3   | 38 |
| 93            | Left       | Salience/Ventral Attention | ParOper_2   | -58 | -44 | 27 |
| 99            | Left       | Salience/Ventral Attention | FrOperIns_3 | -33 | 25  | -1 |
| 101           | Left       | Salience/Ventral Attention | FrOperIns_5 | -33 | 19  | 8  |
| 103           | Left       | Salience/Ventral Attention | FrOperIns_7 | -43 | 12  | 2  |
| 105           | Left       | Salience/Ventral Attention | FrOperIns_9 | -52 | 9   | 13 |
| 107           | Left       | Salience/Ventral Attention | Med_1       | -6  | 22  | 31 |
| 110           | Left       | Salience/Ventral Attention | Med_4       | -5  | 9   | 48 |
| 127           | Left       | Control                    | Par_1       | -29 | -74 | 42 |
| 130           | Left       | Control                    | Par_4       | -35 | -62 | 48 |
| 139           | Left       | Control                    | PFCI_5      | -42 | 38  | 22 |
| 140           | Left       | Control                    | PFCI_6      | -45 | 20  | 27 |
| 144           | Left       | Control                    | pCun_1      | -9  | -77 | 45 |
| 148           | Left       | Control                    | PFCmp_1     | -4  | 28  | 47 |
| 172           | Left       | Default                    | PFC_7       | -48 | 28  | 0  |
| 175           | Left       | Default                    | PFC_10      | -53 | 19  | 11 |
| 185           | Left       | Default                    | PFC_20      | -42 | 7   | 48 |
| 189           | Left       | Default                    | PFC_24      | -6  | 10  | 65 |
| 219           | Right      | Visual                     | 19          | 9   | -74 | 9  |
| 301           | Right      | Salience/Ventral Attention | PrC_1       | 51  | 3   | 41 |
| 303           | Right      | Salience/Ventral Attention | FrOperIns_2 | 41  | 8   | -3 |
| 306           | Right      | Salience/Ventral Attention | FrOperIns_5 | 37  | 23  | 5  |
| 314           | Right      | Salience/Ventral Attention | Med_4       | 6   | 11  | 58 |
| 340           | Right      | Control                    | PFCv_1      | 34  | 21  | -8 |
| 346           | Right      | Control                    | PFCI_6      | 50  | 30  | 18 |
| 347           | Right      | Control                    | PFCI_7      | 48  | 18  | 23 |
| 349           | Right      | Control                    | PFCI_9      | 47  | 29  | 28 |
| 350           | Right      | Control                    | PFCI_10     | 39  | 11  | 34 |
| 353           | Right      | Control                    | PFCI_13     | 43  | 7   | 51 |

### NULL34 Parcel Set

| Parcel Number | Hemisphere | Network                    | ROI         | X   | Y   | Z   |
|---------------|------------|----------------------------|-------------|-----|-----|-----|
| 4             | Left       | Visual                     | 4           | -24 | -55 | -8  |
| 5             | Left       | Visual                     | 5           | -23 | -73 | -10 |
| 51            | Left       | SomatoMotor                | 20          | -49 | -17 | 54  |
| 72            | Left       | Dorsal Attention           | Post_4      | -48 | -65 | 15  |
| 97            | Left       | Saliency/Ventral Attention | FrOperIns_1 | -44 | 5   | -17 |
| 100           | Left       | Saliency/Ventral Attention | FrOperIns_4 | -40 | -15 | -2  |
| 121           | Left       | Limbic                     | TempPole_3  | -26 | -9  | -33 |
| 122           | Left       | Limbic                     | TempPole_4  | -54 | -21 | -31 |
| 123           | Left       | Limbic                     | TempPole_5  | -40 | -21 | -27 |
| 125           | Left       | Limbic                     | TempPole_7  | -32 | 12  | -29 |
| 150           | Left       | Default                    | Temp_2      | -62 | -18 | -21 |
| 153           | Left       | Default                    | Temp_5      | -53 | 6   | -11 |
| 174           | Left       | Default                    | PFC_9       | -6  | 45  | 6   |
| 211           | Right      | Visual                     | 11          | 9   | -72 | -5  |
| 221           | Right      | Visual                     | 21          | 24  | -99 | 7   |
| 235           | Right      | SomatoMotor                | 5           | 37  | -8  | 14  |
| 244           | Right      | SomatoMotor                | 14          | 62  | -12 | 15  |
| 245           | Right      | SomatoMotor                | 15          | 61  | 6   | 30  |
| 266           | Right      | SomatoMotor                | 36          | 17  | -6  | 69  |
| 268           | Right      | SomatoMotor                | 38          | 5   | -22 | 72  |
| 270           | Right      | SomatoMotor                | 40          | 13  | -33 | 76  |
| 272           | Right      | Dorsal Attention           | Post_2      | 59  | -55 | -2  |
| 279           | Right      | Dorsal Attention           | Post_9      | 45  | -28 | 42  |
| 302           | Right      | Saliency/Ventral Attention | FrOperIns_1 | 40  | 5   | -15 |
| 304           | Right      | Saliency/Ventral Attention | FrOperIns_3 | 40  | -10 | -4  |
| 307           | Right      | Saliency/Ventral Attention | FrOperIns_6 | 38  | 7   | 11  |
| 321           | Right      | Limbic                     | OFC_3       | 8   | 47  | -23 |
| 323           | Right      | Limbic                     | OFC_5       | 5   | 22  | -21 |
| 325           | Right      | Limbic                     | TempPole_1  | 28  | -1  | -40 |
| 326           | Right      | Limbic                     | TempPole_2  | 49  | -7  | -39 |
| 330           | Right      | Limbic                     | TempPole_6  | 50  | -28 | -26 |
| 369           | Right      | Default                    | Temp_3      | 47  | 16  | -20 |
| 376           | Right      | Default                    | PFCv_2      | 35  | 38  | -13 |
| 381           | Right      | Default                    | PFCdPFCm_3  | 7   | 42  | 4   |

[https://github.com/ThomasYeoLab/CBIG/tree/master/stable\\_projects/brain\\_parcellation/Schaefer2018\\_LocalGlobal/Parcellations/](https://github.com/ThomasYeoLab/CBIG/tree/master/stable_projects/brain_parcellation/Schaefer2018_LocalGlobal/Parcellations/)

## S.2 A Flowchart of Statistical Analyses for Multivariate Pattern Similarity Analyses

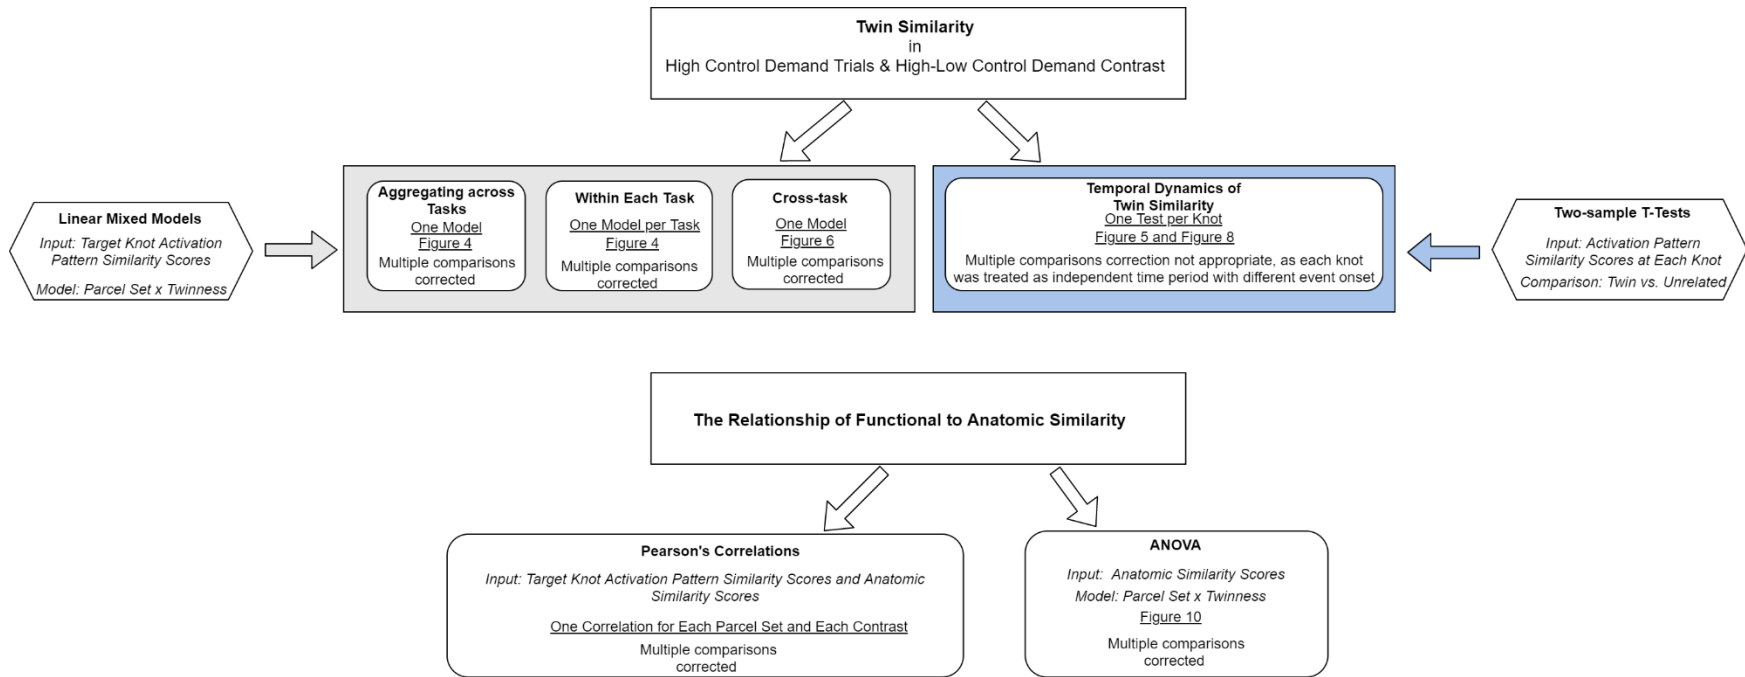

### S.3 High Control Trials: Linear Mixed Model

LMM setup and tests of main effects and interaction.

```
## high control
head(high.tbl)# show dataframe structure

##   task control parcel.set pair.id twinness similarity
## 1 Axcpt   high   FPN34      1    twin  0.2126089
## 2 Axcpt   high   FPN34      2    twin  0.2010375
## 3 Axcpt   high   FPN34      3    twin  0.4143421
## 4 Axcpt   high   FPN34      4    twin  0.3783064
## 5 Axcpt   high   FPN34      5    twin         NA
## 6 Axcpt   high   FPN34      6    twin  0.1616736

##LMM
modelhigh<-lme(fixed=similarity~twinness*parcel.set,
               random=list(pair.id=~1, task=~1), data=high.tbl,na.action=na.omit);
anova(modelhigh)

##              numDF denDF  F-value p-value
## (Intercept)         1   276 736.2441 <.0001
## twinness             1    73  46.0577 <.0001
## parcel.set           1   276 471.6839 <.0001
## twinness:parcel.set  1   276  24.9393 <.0001
```

A significant interaction effect was detected, follow-up with post-hoc contrasts.

```
# post-hoc tests, correct for multiple comparisons
a<-pairs(lsmeans(modelhigh, ~ twinness | parcel.set))
b<-pairs(lsmeans(modelhigh, ~ parcel.set | twinness))
rbind(a, b, adjust="tukey")

## parcel.set twinness contrast      estimate      SE df t.ratio p.value
## NULL34     .          unrelated - twin  -0.0266 0.01055 73  -2.523 0.0463
## FPN34      .          unrelated - twin  -0.0889 0.01055 73  -8.426 <.0001
## .          unrelated NULL34 - FPN34   -0.1078 0.00763 276 -14.128 <.0001
## .          twin      NULL34 - FPN34   -0.1701 0.00987 276 -17.235 <.0001
##
## Degrees-of-freedom method: containment
## P value adjustment: tukey method for comparing a family of 3.372 estimates
```

## S.4 High Control Trials By Task: Linear Mixed Model

LMM setup and tests of main effects and interaction.

### AX-CPT

```
## high control
head(axcpt.tbl)# show dataframe structure

##   task control parcel.set pair.id twinness similarity
## 1 Axcpt    high    FPN34      1    twin  0.2126089
## 2 Axcpt    high    FPN34      2    twin  0.2010375
## 3 Axcpt    high    FPN34      3    twin  0.4143421
## 4 Axcpt    high    FPN34      4    twin  0.3783064
## 5 Axcpt    high    FPN34      5    twin           NA
## 6 Axcpt    high    FPN34      6    twin  0.1616736

#LMM
modelax<-lme(fixed=similarity~twinness*parcel.set,
             random=list(pair.id=~1), data=axcpt.tbl,na.action=na.omit);
anova(modelax)

##               numDF denDF  F-value p-value
## (Intercept)         1    66 160.3835 <.0001
## twinness             1    66  21.9590 <.0001
## parcel.set           1    66 165.7394 <.0001
## twinness:parcel.set  1    66  17.1129 1e-04
```

A significant interaction effect was detected, follow-up with post-hoc contrasts.

```
# post-hoc tests, correct for multiple comparisons
a<-pairs(lsmeans(modelax, ~ twinness | parcel.set))
b<-pairs(lsmeans(modelax, ~ parcel.set | twinness))
rbind(a, b, adjust="tukey")

## parcel.set twinness contrast      estimate      SE df t.ratio p.value
## NULL34      .          unrelated - twin  -0.0163 0.0205 66  -0.794 0.7753
## FPN34       .          unrelated - twin  -0.1284 0.0205 66  -6.251 <.0001
## .           .          unrelated NULL34 - FPN34 -0.1266 0.0168 66  -7.560 <.0001
## .           .          twin      NULL34 - FPN34 -0.2387 0.0213 66 -11.212 <.0001
##
## Degrees-of-freedom method: containment
## P value adjustment: tukey method for comparing a family of 3.372 estimates
```

### Cued-TS

```
## high control
head(cuedts.tbl)# show dataframe structure

##   task control parcel.set pair.id twinness similarity
## 110 Cuedts    high    FPN34      1    twin  0.3141900
## 210 Cuedts    high    FPN34      2    twin  0.2314887
## 310 Cuedts    high    FPN34      3    twin  0.2553753
## 410 Cuedts    high    FPN34      4    twin  0.2703203
## 510 Cuedts    high    FPN34      5    twin  0.3195665
## 610 Cuedts    high    FPN34      6    twin  0.1503126
```

```
#LMM
modelc<-lme(fixed=similarity~twinness*parcel.set,
            random=list(pair.id=~1), data=cuedts.tbl,na.action=na.omit);
anova(modelc)

##                numDF denDF  F-value p-value
## (Intercept)         1    73 376.8053 <.0001
## twinness            1    73  32.1907 <.0001
## parcel.set          1    73 270.3082 <.0001
## twinness:parcel.set  1    73   8.8754 0.0039
```

A significant interaction effect was detected, follow-up with post-hoc contrasts.

```
# post-hoc tests, correct for multiple comparisons
a<-pairs(lsmeans(modelc, ~ twinness | parcel.set))
b<-pairs(lsmeans(modelc, ~ parcel.set | twinness))
rbind(a, b, adjust="tukey")

## parcel.set twinness contrast      estimate      SE df t.ratio p.value
## NULL34      .        unrelated - twin  -0.0524 0.0167 73  -3.145 0.0087
## FPN34       .        unrelated - twin  -0.1063 0.0167 73  -6.382 <.0001
## .          unrelated NULL34 - FPN34   -0.1238 0.0111 73 -11.195 <.0001
## .          twin      NULL34 - FPN34   -0.1777 0.0143 73 -12.404 <.0001
##
## Degrees-of-freedom method: containment
## P value adjustment: tukey method for comparing a family of 3.372 estimates
```

## Sternberg

```
## high control
head(stern.tbl)# show dataframe structure

##      task control parcel.set pair.id twinness similarity
## 112 Stern      high      FPN34      1      twin  0.16884610
## 212 Stern      high      FPN34      2      twin  0.14938842
## 312 Stern      high      FPN34      3      twin  0.18802240
## 412 Stern      high      FPN34      4      twin -0.03453269
## 512 Stern      high      FPN34      5      twin  0.16604061
## 612 Stern      high      FPN34      6      twin           NA

#LMM
modelst<-lme(fixed=similarity~twinness*parcel.set,
             random=list(pair.id=~1), data=stern.tbl,na.action=na.omit);
anova(modelst)

##                numDF denDF  F-value p-value
## (Intercept)         1    64 124.61406 <.0001
## twinness            1    64   3.58063  0.063
## parcel.set          1    64  88.72655 <.0001
## twinness:parcel.set  1    64   4.58793  0.036
```

A significant interaction effect was detected, follow-up with post-hoc contrasts.

```
# post-hoc tests, correct for multiple comparisons
a<-pairs(lsmeans(modelst, ~ twinness | parcel.set))
b<-pairs(lsmeans(modelst, ~ parcel.set | twinness))
rbind(a, b, adjust="tukey")
```

```
## parcel.set twinness contrast estimate SE df t.ratio p.value
## NULL34 . unrelated - twin -0.00137 0.0192 64 -0.072 0.9991
## FPN34 . unrelated - twin -0.05428 0.0192 64 -2.827 0.0219
## . unrelated NULL34 - FPN34 -0.09283 0.0152 64 -6.106 <.0001
## . twin NULL34 - FPN34 -0.14574 0.0195 64 -7.486 <.0001
##
## Degrees-of-freedom method: containment
## P value adjustment: tukey method for comparing a family of 3.372 estimates
```

## Stroop

```
## high control
head(stroop.tbl)# show dataframe structure

## task control parcel.set pair.id twinness similarity
## 114 Stroop high FPN34 1 twin 0.26581050
## 214 Stroop high FPN34 2 twin 0.28225244
## 314 Stroop high FPN34 3 twin 0.14766637
## 414 Stroop high FPN34 4 twin -0.01591414
## 514 Stroop high FPN34 5 twin 0.31018286
## 614 Stroop high FPN34 6 twin 0.25863224

#LMM
modelstro<-lme(fixed=similarity~twinness*parcel.set,
  random=list(pair.id=~1), data=stroop.tbl,na.action=na.omit);
anova(modelstro)

## numDF denDF F-value p-value
## (Intercept) 1 67 371.6755 <.0001
## twinness 1 67 11.8195 0.0010
## parcel.set 1 67 60.1086 <.0001
## twinness:parcel.set 1 67 1.1522 0.2869
```

A significant interaction effect was not detected, suggesting the effect of twinness was similar in both parcel sets. Nevertheless, we conducted separate linear mixed models to investigate the twinness effect within each parcel set, which found twins to be greater than unrelated in pattern similarity in FPN34 but not NULL34.

```
#LMM
#FPN34
FPN34<-stroop.tbl[which(stroop.tbl$parcel.set=="FPN34"),];
modelfpn34<-lme(fixed=similarity~twinness,
  random=list(pair.id=~1), data=FPN34,na.action=na.omit);
summary(modelfpn34)

## Linear mixed-effects model fit by REML
## Data: FPN34
## AIC BIC logLik
## -120.2477 -111.4289 64.12385
##
## Random effects:
## Formula: ~1 | pair.id
## (Intercept) Residual
## StdDev: 0.08257397 0.03096524
##
## Fixed effects: similarity ~ twinness
## Value Std.Error DF t-value p-value
## (Intercept) 0.16293933 0.01329500 67 12.255688 0.0000
## twinnesstwin 0.06520431 0.02208731 67 2.952117 0.0043
```



```

## Correlation:
##           (Intr)
## twinnesstwin -0.602
##
## Standardized Within-Group Residuals:
##           Min           Q1           Med           Q3           Max
## -0.97171275 -0.25980282  0.00227864  0.26376166  0.72899245
##
## Number of Observations: 69
## Number of Groups: 69

#NULL34
NULL34<-stroop.tbl[which(stroop.tbl$parcel.set=="NULL34"),];
modelnull34<-lme(fixed=similarity~twinness,
  random=list(pair.id=~1), data=NULL34,na.action=na.omit);
summary(modelnull34)

## Linear mixed-effects model fit by REML
## Data: NULL34
##           AIC           BIC    logLik
## -154.2602 -145.4414 81.13009
##
## Random effects:
## Formula: ~1 | pair.id
##           (Intercept) Residual
## StdDev:  0.0640632 0.0240237
##
## Fixed effects: similarity ~ twinness
##           Value Std.Error DF t-value p-value
## (Intercept) 0.07635109 0.01031463 67 7.402212 0.0000
## twinnesstwin 0.03735805 0.01713595 67 2.180098 0.0328
## Correlation:
##           (Intr)
## twinnesstwin -0.602
##
## Standardized Within-Group Residuals:
##           Min           Q1           Med           Q3           Max
## -0.930349693 -0.179647303 -0.001457457  0.251114729  0.824744220
##
## Number of Observations: 69
## Number of Groups: 69

```

## S.5 Cross-task High Control Trials: Linear Mixed Model

LMM setup and tests of main effects and interaction.

```
## high control
head(high.tbl)# show dataframe structure

##   twinness parcel.set similarity pair.id
## 1     Twin     FPN34  0.1514107      1
## 2     Twin     FPN34  0.1865529      2
## 3     Twin     FPN34  0.1288416      3
## 4     Twin     FPN34  0.1480226      4
## 5     Twin     FPN34         NA      5
## 6     Twin     FPN34         NA      6

##LMM
modelhigh<-lme(fixed=similarity~twinness*parcel.set,
               random=list(pair.id=~1), data=high.tbl,na.action=na.omit);
anova(modelhigh)

##                numDF denDF  F-value p-value
## (Intercept)          1    53 529.9198 <.0001
## twinness             1    53  31.8858 <.0001
## parcel.set           1    53 234.9413 <.0001
## twinness:parcel.set  1    53   9.3795 0.0034
```

A significant interaction effect was detected, follow-up with post-hoc contrasts.

```
# post-hoc tests, correct for multiple comparisons
a<-pairs(lsmeans(modelhigh, ~ twinness | parcel.set))
b<-pairs(lsmeans(modelhigh, ~ parcel.set | twinness))
rbind(a, b, adjust="tukey")

## parcel.set twinness contrast      estimate      SE df t.ratio p.value
## FPN34      .          Unrelated - Twin -0.0568 0.00922 53 -6.158 <.0001
## NULL34     .          Unrelated - Twin -0.0168 0.00922 53 -1.827 0.2085
## .          Unrelated FPN34 - NULL34  0.0818 0.00806 53 10.159 <.0001
## .          Twin      FPN34 - NULL34  0.1218 0.01025 53 11.879 <.0001
##
## Degrees-of-freedom method: containment
## P value adjustment: tukey method for comparing a family of 3.372 estimates
```

## S.6 High-Low Control Contrast: Linear Mixed Model

LMM setup and tests of main effects and interaction.

```
## high-low control contrast
head(highlow.tbl)# show dataframe structure

##   task control parcel.set pair.id twinness similarity
## 1 Axcpt high-low   FPN34     1    twin 0.22192699
## 2 Axcpt high-low   FPN34     2    twin 0.22422743
## 3 Axcpt high-low   FPN34     3    twin 0.27727240
## 4 Axcpt high-low   FPN34     4    twin 0.09489604
## 5 Axcpt high-low   FPN34     5    twin          NA
## 6 Axcpt high-low   FPN34     6    twin 0.19355016

#LMM
modelhighlow<-lme(fixed=similarity~twinness*parcel.set,
  random=list(pair.id=~1, task=~1), data=highlow.tbl,na.action=na.omit);
anova(modelhighlow)

##              numDF denDF  F-value p-value
## (Intercept)         1   276 160.85556 <.0001
## twinness            1    73  13.65959 0.0004
## parcel.set          1   276  95.38810 <.0001
## twinness:parcel.set 1   276   9.44518 0.0023
```

A significant interaction effect was detected, follow-up with post-hoc contrasts.

```
# post-hoc tests, correct for multiple comparisons
a<-pairs(lsmeans(modelhighlow, ~ twinness | parcel.set))
b<-pairs(lsmeans(modelhighlow, ~ parcel.set | twinness))
rbind(a, b, adjust="tukey")

## parcel.set twinness contrast      estimate      SE df t.ratio p.value
## NULL34      .          unrelated - twin -0.00425 0.00965 73 -0.440 0.9364
## FPN34       .          unrelated - twin -0.04619 0.00965 73 -4.787 <.0001
## .           unrelated NULL34 - FPN34 -0.04881 0.00835 276 -5.847 <.0001
## .           twin      NULL34 - FPN34 -0.09075 0.01080 276 -8.405 <.0001
##
## Degrees-of-freedom method: containment
## P value adjustment: tukey method for comparing a family of 3.372 estimates
```

## S.7 High-Low Control Contrast By Task: Linear Mixed Model

LMM setup and tests of main effects and interaction.

### AX-CPT

```
## high-low control contrast
head(axcpt.tbl)# show dataframe structure

##   task control parcel.set pair.id twinness similarity
## 1 Axcpt high-low      FPN34      1   twin 0.22192699
## 2 Axcpt high-low      FPN34      2   twin 0.22422743
## 3 Axcpt high-low      FPN34      3   twin 0.27727240
## 4 Axcpt high-low      FPN34      4   twin 0.09489604
## 5 Axcpt high-low      FPN34      5   twin          NA
## 6 Axcpt high-low      FPN34      6   twin 0.19355016

#LMM
modelax<-lme(fixed=similarity~twinness*parcel.set,
             random=list(pair.id=~1), data=axcpt.tbl,na.action=na.omit);
anova(modelax)

##              numDF denDF  F-value p-value
## (Intercept)         1    66 131.15350 <.0001
## twinness            1    66  13.98193  4e-04
## parcel.set          1    66 140.42026 <.0001
## twinness:parcel.set 1    66  17.07632  1e-04
```

A significant interaction effect was detected, follow-up with post-hoc contrasts.

```
# post-hoc tests, correct for multiple comparisons
a<-pairs(lsmeans(modelax, ~ twinness | parcel.set))
b<-pairs(lsmeans(modelax, ~ parcel.set | twinness))
rbind(a, b, adjust="tukey")

## parcel.set twinness contrast      estimate      SE df t.ratio p.value
## NULL34      .          unrelated - twin -0.00139 0.0165 66  -0.084 0.9987
## FPN34       .          unrelated - twin -0.09116 0.0165 66  -5.536 <.0001
## .           unrelated NULL34 - FPN34 -0.09077 0.0134 66  -6.758 <.0001
## .           twin      NULL34 - FPN34 -0.18054 0.0171 66 -10.575 <.0001
##
## Degrees-of-freedom method: containment
## P value adjustment: tukey method for comparing a family of 3.372 estimates
```

### Cued-TS

```
## high-low control contrast
head(cuedts.tbl)# show dataframe structure

##   task control parcel.set pair.id twinness similarity
## 110 Cuedts high-low      FPN34      1   twin -0.01092737
## 210 Cuedts high-low      FPN34      2   twin -0.01508454
## 310 Cuedts high-low      FPN34      3   twin -0.01431027
## 410 Cuedts high-low      FPN34      4   twin  0.07565474
## 510 Cuedts high-low      FPN34      5   twin  0.03674998
## 610 Cuedts high-low      FPN34      6   twin  0.02490381
```

```
#LMM
modelc<-lme(fixed=similarity~twinness*parcel.set,
            random=list(pair.id=~1), data=cuedts.tbl,na.action=na.omit);
anova(modelc)

##                numDF denDF  F-value p-value
## (Intercept)          1    73 3.971081 0.0500
## twinness             1    73 3.821791 0.0544
## parcel.set           1    73 0.495905 0.4835
## twinness:parcel.set  1    73 2.394553 0.1261
```

A significant interaction effect was not detected, suggesting the effect of twinness was similar in both parcel sets. Nevertheless, we conducted separate linear mixed models to investigate the twinness effect within each parcel set, which found twins to be greater than unrelated in pattern similarity in FPN34 but not NULL34.

```
#LMM
#FPN34
FPN34<-cuedts.tbl[which(cuedts.tbl$parcel.set=="FPN34"),];
modelfpn34<-lme(fixed=similarity~twinness,
                random=list(pair.id=~1), data=FPN34,na.action=na.omit);
summary(modelfpn34)

## Linear mixed-effects model fit by REML
## Data: FPN34
##      AIC      BIC logLik
## -165.86 -156.6982  86.93
##
## Random effects:
## Formula: ~1 | pair.id
##      (Intercept)  Residual
## StdDev:  0.06556306 0.02458615
##
## Fixed effects: similarity ~ twinness
##              Value Std.Error DF   t-value p-value
## (Intercept) -0.00655381 0.01021367 73 -0.641671  0.5231
## twinnesstwin  0.03718724 0.01671604 73  2.224644  0.0292
## Correlation:
##      (Intr)
## twinnesstwin -0.611
##
## Standardized Within-Group Residuals:
##      Min      Q1      Med      Q3      Max
## -1.11796735 -0.20742430  0.03067154  0.20286372  0.90541617
##
## Number of Observations: 75
## Number of Groups: 75

#NULL34
NULL34<-cuedts.tbl[which(cuedts.tbl$parcel.set=="NULL34"),];
modelnull34<-lme(fixed=similarity~twinness,
                 random=list(pair.id=~1), data=NULL34,na.action=na.omit);
summary(modelnull34)

## Linear mixed-effects model fit by REML
## Data: NULL34
##      AIC      BIC  logLik
## -203.3658 -194.204 105.6829
##
## Random effects:
## Formula: ~1 | pair.id
##      (Intercept)  Residual
```

```
## StdDev: 0.05071001 0.01901625
##
## Fixed effects: similarity ~ twinness
##           Value Std.Error DF   t-value p-value
## (Intercept) 0.011762555 0.007899802 73 1.4889684 0.1408
## twinness*twin 0.006323043 0.012929085 73 0.4890557 0.6263
## Correlation:
##           (Intr)
## twinness*twin -0.611
##
## Standardized Within-Group Residuals:
##           Min      Q1      Med      Q3      Max
## -0.62702351 -0.25992652 -0.00663448 0.23055008 1.10516447
##
## Number of Observations: 75
## Number of Groups: 75
```

## Sternberg

```
## high-low control contrast
head(stern.tbl)# show dataframe structure

##      task control parcel.set pair.id twinness similarity
## 112 Stern high-low      FPN34      1 twin 0.071160403
## 212 Stern high-low      FPN34      2 twin -0.002437876
## 312 Stern high-low      FPN34      3 twin -0.016845013
## 412 Stern high-low      FPN34      4 twin 0.028872827
## 512 Stern high-low      FPN34      5 twin -0.006765266
## 612 Stern high-low      FPN34      6 twin          NA

#LMM
modelst<-lme(fixed=similarity~twinness*parcel.set,
             random=list(pair.id=~1), data=stern.tbl,na.action=na.omit);
anova(modelst)

##           numDF denDF   F-value p-value
## (Intercept)      1    64 13.405395 0.0005
## twinness         1    64 0.337403 0.5634
## parcel.set       1    64 5.388711 0.0235
## twinness:parcel.set 1    64 0.186014 0.6677
```

A significant interaction effect was not detected, suggesting the effect of twinness was similar in both parcel sets. Nevertheless, we conducted separate linear mixed models to investigate the twinness effect within each parcel set, which found twins to be numerically (did not reach significance) greater than unrelated in pattern similarity in FPN34 but not NULL34.

```
#LMM
#FPN34
FPN34<-stern.tbl[which(stern.tbl$parcel.set=="FPN34"),];
modelf34<-lme(fixed=similarity~twinness,
              random=list(pair.id=~1), data=FPN34,na.action=na.omit);
summary(modelf34)

## Linear mixed-effects model fit by REML
## Data: FPN34
##           AIC           BIC    logLik
## -132.564 -123.9284 70.28199
##
```

```

## Random effects:
## Formula: ~1 | pair.id
##      (Intercept)  Residual
## StdDev:  0.07157263 0.02683975
##
## Fixed effects: similarity ~ twinness
##      Value Std.Error DF   t-value p-value
## (Intercept) 0.02903827 0.01193786 64 2.4324513 0.0178
## twinnesstwin 0.01166911 0.01939673 64 0.6016021 0.5496
## Correlation:
##      (Intr)
## twinnesstwin -0.615
##
## Standardized Within-Group Residuals:
##      Min      Q1      Med      Q3      Max
## -0.85144692 -0.17858105 -0.02150301 0.22226323 0.82060541
##
## Number of Observations: 66
## Number of Groups: 66

#NULL34
NULL34<-stern.tbl[which(stern.tbl$parcel.set=="NULL34"),];
modelnull34<-lme(fixed=similarity~twinness,
  random=list(pair.id=~1), data=NULL34,na.action=na.omit);
summary(modelnull34)

## Linear mixed-effects model fit by REML
## Data: NULL34
##      AIC      BIC  logLik
## -189.1392 -180.5036 98.56958
##
## Random effects:
## Formula: ~1 | pair.id
##      (Intercept)  Residual
## StdDev:  0.04600358 0.01725134
##
## Fixed effects: similarity ~ twinness
##      Value Std.Error DF   t-value p-value
## (Intercept) 0.006840681 0.007673105 64 0.8915141 0.3760
## twinnesstwin 0.001724395 0.012467320 64 0.1383132 0.8904
## Correlation:
##      (Intr)
## twinnesstwin -0.615
##
## Standardized Within-Group Residuals:
##      Min      Q1      Med      Q3      Max
## -0.73604293 -0.18656899 -0.01703464 0.20353289 0.94910970
##
## Number of Observations: 66
## Number of Groups: 66

```

## Stroop

```

## high-low control contrast
head(stroop.tbl)# show dataframe structure

##      task control parcel.set pair.id twinness similarity
## 114 Stroop high-low      FPN34      1      twin 0.09222377
## 214 Stroop high-low      FPN34      2      twin 0.10709531

```

```
## 314 Stroop high-low      FPN34      3      twin 0.11660831
## 414 Stroop high-low      FPN34      4      twin 0.05962269
## 514 Stroop high-low      FPN34      5      twin 0.14659129
## 614 Stroop high-low      FPN34      6      twin 0.10822541

#LMM
modelstro<-lme(fixed=similarity~twinness*parcel.set,
  random=list(pair.id=~1), data=stroop.tbl,na.action=na.omit);
anova(modelstro)

##                numDF denDF  F-value p-value
## (Intercept)          1    67 121.50445 <.0001
## twinness             1    67  4.11842  0.0464
## parcel.set           1    67 88.96339 <.0001
## twinness:parcel.set  1    67  2.12619  0.1495
```

A significant interaction effect was not detected, suggesting the effect of twinness was similar in both parcel sets. Nevertheless, we conducted separate linear mixed models to investigate the twinness effect within each parcel set, which found twins to be greater than unrelated in pattern similarity in FPN34 but not NULL34.

```
#LMM
#FPN34
FPN34<-stroop.tbl[which(stroop.tbl$parcel.set=="FPN34"),];
modelfpn34<-lme(fixed=similarity~twinness,
  random=list(pair.id=~1), data=FPN34,na.action=na.omit);
summary(modelfpn34)

## Linear mixed-effects model fit by REML
## Data: FPN34
##      AIC      BIC  logLik
## -134.1663 -125.3475 71.08315
##
## Random effects:
## Formula: ~1 | pair.id
##      (Intercept)  Residual
## StdDev:  0.07442741 0.02791028
##
## Fixed effects: similarity ~ twinness
##              Value Std.Error DF  t-value p-value
## (Intercept)  0.11256618 0.01198334 67 9.393553 0.0000
## twinnesstwin 0.04581656 0.01990823 67 2.301388 0.0245
## Correlation:
##      (Intr)
## twinnesstwin -0.602
##
## Standardized Within-Group Residuals:
##      Min      Q1      Med      Q3      Max
## -0.86669674 -0.2215923  0.03806681  0.24063412  0.81330833
##
## Number of Observations: 69
## Number of Groups: 69

#NULL34
NULL34<-stroop.tbl[which(stroop.tbl$parcel.set=="NULL34"),];
modelnull34<-lme(fixed=similarity~twinness,
  random=list(pair.id=~1), data=NULL34,na.action=na.omit);
summary(modelnull34)

## Linear mixed-effects model fit by REML
## Data: NULL34
##      AIC      BIC  logLik
```



```
## -154.176 -145.3572 81.08799
##
## Random effects:
## Formula: ~1 | pair.id
## (Intercept) Residual
## StdDev: 0.06410346 0.0240388
##
## Fixed effects: similarity ~ twinness
## Value Std.Error DF t-value p-value
## (Intercept) 0.007326753 0.01032111 67 0.7098801 0.4802
## twinnesstwin 0.007504566 0.01714672 67 0.4376677 0.6630
## Correlation:
## (Intr)
## twinnesstwin -0.602
##
## Standardized Within-Group Residuals:
## Min Q1 Med Q3 Max
## -1.304457487 -0.179731382 -0.000765695 0.205306758 0.757457138
##
## Number of Observations: 69
## Number of Groups: 69
```

## One sample t-tests

We examined whether similarity scores in cued-ts and sternberg tasks are significantly greater than zero.

```
#cued-ts
FPN34<-cuedts.tbl[which(cuedts.tbl$parcel.set=="FPN34"),];

twin<-FPN34[which(FPN34$twinness=="twin"),];
t.test(twin$similarity, mu = 0, alternative = "greater");

##
## One Sample t-test
##
## data: twin$similarity
## t = 2.5077, df = 27, p-value = 0.009234
## alternative hypothesis: true mean is greater than 0
## 95 percent confidence interval:
## 0.009826314 Inf
## sample estimates:
## mean of x
## 0.03063343

#sternberg
FPN34<-stern.tbl[which(stern.tbl$parcel.set=="FPN34"),];

twin<-FPN34[which(FPN34$twinness=="twin"),];
t.test(twin$similarity, mu = 0, alternative = "greater");

##
## One Sample t-test
##
## data: twin$similarity
## t = 2.5465, df = 24, p-value = 0.008858
## alternative hypothesis: true mean is greater than 0
## 95 percent confidence interval:
## 0.0133575 Inf
## sample estimates:
## mean of x
## 0.04070738
```

## S.8 High Control Trials (FPN vs. SOMA): Linear Mixed Model

LMM setup and tests of main effects and interaction.

```
## high control
head(high.tbl)# show dataframe structure

##   task control parcel.set pair.id twinness similarity
## 1 Axcpt   high   FPN34      1    twin  0.2126089
## 2 Axcpt   high   FPN34      2    twin  0.2010375
## 3 Axcpt   high   FPN34      3    twin  0.4143421
## 4 Axcpt   high   FPN34      4    twin  0.3783064
## 5 Axcpt   high   FPN34      5    twin           NA
## 6 Axcpt   high   FPN34      6    twin  0.1616736

##LMM
modelhigh<-lme(fixed=similarity~twinness*parcel.set,
               random=list(pair.id=~1, task=~1), data=high.tbl,na.action=na.omit);
anova(modelhigh)

##              numDF denDF  F-value p-value
## (Intercept)         1   276 794.3845 <.0001
## twinness             1    73  29.1130 <.0001
## parcel.set           1   276   0.6109  0.4351
## twinness:parcel.set  1   276   4.2044  0.0413
```

A significant interaction effect was detected, follow-up with post-hoc contrasts.

```
# post-hoc tests, correct for multiple comparisons
a<-pairs(lsmeans(modelhigh, ~ twinness | parcel.set))
b<-pairs(lsmeans(modelhigh, ~ parcel.set | twinness))
rbind(a, b, adjust="tukey")

## parcel.set twinness contrast      estimate      SE df t.ratio p.value
## SOMA      .      unrelated - twin -0.04850 0.0161 73 -3.011 0.0128
## FPN34     .      unrelated - twin -0.08893 0.0161 73 -5.522 <.0001
## .         unrelated SOMA - FPN34   0.00767 0.0121 276  0.636 0.8576
## .         twin      SOMA - FPN34  -0.03277 0.0156 276 -2.100 0.1147
##
## Degrees-of-freedom method: containment
## P value adjustment: tukey method for comparing a family of 3.372 estimates
```

Figure S1: Means of Similarity Scores of High Control Demand Trials

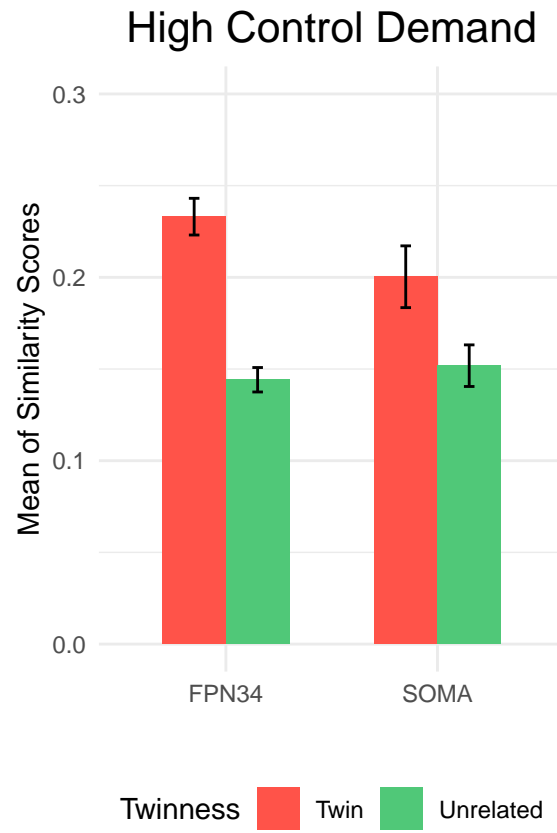

## Linear Mixed Model by Task

### AX-CPT

```
## high control
head(axcpt.tbl)# show dataframe structure

##      task control parcel.set pair.id twinness similarity
## 1 Axcpt      high      FPN34      1      twin  0.2126089
## 2 Axcpt      high      FPN34      2      twin  0.2010375
## 3 Axcpt      high      FPN34      3      twin  0.4143421
## 4 Axcpt      high      FPN34      4      twin  0.3783064
## 5 Axcpt      high      FPN34      5      twin           NA
## 6 Axcpt      high      FPN34      6      twin  0.1616736

##LMM
modelax<-lme(fixed=similarity~twinness*parcel.set,
             random=list(pair.id=~1), data=axcpt.tbl,na.action=na.omit);
anova(modelax)

##              numDF denDF   F-value p-value
## (Intercept)         1    66 124.35636 <.0001
## twinness             1    66  10.93095 0.0015
## parcel.set           1    66  98.32166 <.0001
## twinness:parcel.set  1    66  20.27971 <.0001
```

A significant interaction effect was detected, follow-up with post-hoc contrasts.

```
# post-hoc tests, correct for multiple comparisons
a<-pairs(lsmeans(modelax, ~ twinness | parcel.set))
b<-pairs(lsmeans(modelax, ~ parcel.set | twinness))
rbind(a, b, adjust="tukey")

## parcel.set twinness contrast      estimate      SE df t.ratio p.value
## SOMA      .          unrelated - twin  -0.0206 0.0255 66 -0.807  0.7678
## FPN34     .          unrelated - twin  -0.1284 0.0255 66 -5.032 <.0001
## .         unrelated SOMA - FPN34     -0.0741 0.0148 66 -5.008 <.0001
## .         twin      SOMA - FPN34     -0.1819 0.0188 66 -9.671 <.0001
##
## Degrees-of-freedom method: containment
## P value adjustment: tukey method for comparing a family of 3.372 estimates
```

### Cued-TS

```
## high control
head(cuedts.tbl)# show dataframe structure

##      task control parcel.set pair.id twinness similarity
## 110 Cuedts      high      FPN34      1      twin  0.3141900
## 210 Cuedts      high      FPN34      2      twin  0.2314887
## 310 Cuedts      high      FPN34      3      twin  0.2553753
## 410 Cuedts      high      FPN34      4      twin  0.2703203
## 510 Cuedts      high      FPN34      5      twin  0.3195665
## 610 Cuedts      high      FPN34      6      twin  0.1503126

##LMM
modelc<-lme(fixed=similarity~twinness*parcel.set,
             random=list(pair.id=~1), data=cuedts.tbl,na.action=na.omit);
anova(modelc)
```

| ##                     | numDF | denDF | F-value  | p-value |
|------------------------|-------|-------|----------|---------|
| ## (Intercept)         | 1     | 73    | 440.7674 | <.0001  |
| ## twinness            | 1     | 73    | 30.6060  | <.0001  |
| ## parcel.set          | 1     | 73    | 40.3760  | <.0001  |
| ## twinness:parcel.set | 1     | 73    | 1.6273   | 0.2061  |

A significant interaction effect was not detected, suggesting the effect of twinness was similar in both parcel sets. Nevertheless, we conducted separate linear mixed models to investigate the twinness effect within each parcel set, which found twins to be greater than unrelated in pattern similarity in both FPN34 and SOMA, but the twin similarity was greater in FPN34 than in SOMA.

```
#LMM
#FPN34
FPN34<-cuedts.tbl[which(cuedts.tbl$parcel.set=="FPN34"),];
modelfpn34<-lme(fixed=similarity~twinness,
  random=list(pair.id=~1), data=FPN34,na.action=na.omit);
summary(modelfpn34)

## Linear mixed-effects model fit by REML
## Data: FPN34
##      AIC      BIC  logLik
## -153.5998 -144.438 80.79992
##
## Random effects:
## Formula: ~1 | pair.id
##      (Intercept) Residual
## StdDev:  0.07130641 0.0267399
##
## Fixed effects: similarity ~ twinness
##              Value Std.Error DF   t-value p-value
## (Intercept)  0.1635911 0.01110839 73 14.726804    0
## twinness     0.1063093 0.01818037 73  5.847478    0
## Correlation:
##      (Intr)
## twinness -0.611
##
## Standardized Within-Group Residuals:
##      Min      Q1      Med      Q3      Max
## -0.99337334 -0.24750964 -0.03277698  0.24105245  0.70983450
##
## Number of Observations: 75
## Number of Groups: 75

#SOMA
SOMA<-cuedts.tbl[which(cuedts.tbl$parcel.set=="SOMA"),];
modelSOMA<-lme(fixed=similarity~twinness,
  random=list(pair.id=~1), data=SOMA,na.action=na.omit);
summary(modelSOMA)

## Linear mixed-effects model fit by REML
## Data: SOMA
##      AIC      BIC  logLik
## -127.6628 -118.501 67.83142
##
## Random effects:
## Formula: ~1 | pair.id
##      (Intercept) Residual
## StdDev:  0.08516894 0.03193835
##
## Fixed effects: similarity ~ twinness
##              Value Std.Error DF   t-value p-value
```

```
## (Intercept) 0.10579980 0.01326795 73 7.974089 0e+00
## twinnesstwin 0.07792431 0.02171478 73 3.588538 6e-04
## Correlation:
## (Intr)
## twinnesstwin -0.611
##
## Standardized Within-Group Residuals:
## Min Q1 Med Q3 Max
## -0.863644910 -0.189778584 0.008220879 0.234065690 0.777880061
##
## Number of Observations: 75
## Number of Groups: 75
```

## Sternberg

```
## high control
head(stern.tbl)# show dataframe structure

## task control parcel.set pair.id twinness similarity
## 112 Stern high FPN34 1 twin 0.16884610
## 212 Stern high FPN34 2 twin 0.14938842
## 312 Stern high FPN34 3 twin 0.18802240
## 412 Stern high FPN34 4 twin -0.03453269
## 512 Stern high FPN34 5 twin 0.16604061
## 612 Stern high FPN34 6 twin NA

#LMM
modelst<-lme(fixed=similarity~twinness*parcel.set,
             random=list(pair.id=~1), data=stern.tbl,na.action=na.omit);
anova(modelst)

## numDF denDF F-value p-value
## (Intercept) 1 64 167.33704 <.0001
## twinness 1 64 6.75683 0.0116
## parcel.set 1 64 13.08766 0.0006
## twinness:parcel.set 1 64 0.32751 0.5691
```

A significant interaction effect was not detected, suggesting the effect of twinness was similar in both parcel sets. Nevertheless, we conducted separate linear mixed models to investigate the twinness effect within each parcel set, which found twins to be greater than unrelated in pattern similarity in FPN34 but not SOMA.

```
#LMM
#FPN34
FPN34<-stern.tbl[which(stern.tbl$parcel.set=="FPN34"),];
modelfpn34<-lme(fixed=similarity~twinness,
                random=list(pair.id=~1), data=FPN34,na.action=na.omit);
summary(modelfpn34)

## Linear mixed-effects model fit by REML
## Data: FPN34
## AIC BIC logLik
## -108.8915 -100.2559 58.44574
##
## Random effects:
## Formula: ~1 | pair.id
## (Intercept) Residual
## StdDev: 0.08611247 0.03229217
##
```

```

## Fixed effects: similarity ~ twinness
##           Value Std.Error DF  t-value p-value
## (Intercept) 0.11551219 0.01436301 64 8.042338 0.0000
## twinnesstwin 0.05428494 0.02333713 64 2.326119 0.0232
## Correlation:
##           (Intr)
## twinnesstwin -0.615
##
## Standardized Within-Group Residuals:
##           Min           Q1           Med           Q3           Max
## -0.840114452 -0.221813487 -0.008986425  0.219279620  0.782977214
##
## Number of Observations: 66
## Number of Groups: 66

#SOMA
SOMA<-stern.tbl[which(stern.tbl$parcel.set=="SOMA"),];
modelSOMA<-lme(fixed=similarity~twinness,
  random=list(pair.id=~1), data=SOMA,na.action=na.omit);
summary(modelSOMA)

## Linear mixed-effects model fit by REML
## Data: SOMA
##           AIC           BIC      logLik
## -119.6493 -111.0138 63.82465
##
## Random effects:
## Formula: ~1 | pair.id
##           (Intercept) Residual
## StdDev:  0.07917089 0.02968908
##
## Fixed effects: similarity ~ twinness
##           Value Std.Error DF t-value p-value
## (Intercept) 0.07407748 0.01320520 64 5.60972 0.0000
## twinnesstwin 0.03886846 0.02145591 64 1.81155 0.0747
## Correlation:
##           (Intr)
## twinnesstwin -0.615
##
## Standardized Within-Group Residuals:
##           Min           Q1           Med           Q3           Max
## -0.67433858 -0.19616805 -0.04917016  0.22740790  0.88390574
##
## Number of Observations: 66
## Number of Groups: 66

```

## Stroop

```

## high control
head(stroop.tbl)# show dataframe structure

##           task control parcel.set pair.id twinness similarity
## 114 Stroop      high      FPN34      1      twin  0.26581050
## 214 Stroop      high      FPN34      2      twin  0.28225244
## 314 Stroop      high      FPN34      3      twin  0.14766637
## 414 Stroop      high      FPN34      4      twin -0.01591414
## 514 Stroop      high      FPN34      5      twin  0.31018286
## 614 Stroop      high      FPN34      6      twin  0.25863224

```

```

#LMM
modelstro<-lme(fixed=similarity~twinness*parcel.set,
  random=list(pair.id=~1), data=stroop.tbl,na.action=na.omit);
anova(modelstro)

##
##          numDF denDF  F-value p-value
## (Intercept)      1    67 1161.9055 <.0001
## twinness        1    67  14.7810 0.0003
## parcel.set      1    67 276.3771 <.0001
## twinness:parcel.set 1    67   0.0359 0.8503

```

A significant interaction effect was not detected, suggesting the effect of twinness was similar in both parcel sets. Nevertheless, we conducted separate linear mixed models to investigate the twinness effect within each parcel set, which found twins to be greater than unrelated in pattern similarity in both FPN34 and SOMA. The twin similarity was greater in SOMA than in FPN34, likely due to the task being vocal, which could activate the somatomotor network.

```

#LMM
#FPN34
FPN34<-stroop.tbl[which(stroop.tbl$parcel.set=="FPN34"),];
modelfpn34<-lme(fixed=similarity~twinness,
  random=list(pair.id=~1), data=FPN34,na.action=na.omit);
summary(modelfpn34)

## Linear mixed-effects model fit by REML
## Data: FPN34
##      AIC      BIC  logLik
## -120.2477 -111.4289 64.12385
##
## Random effects:
## Formula: ~1 | pair.id
##      (Intercept)  Residual
## StdDev:  0.08257397 0.03096524
##
## Fixed effects: similarity ~ twinness
##              Value Std.Error DF   t-value p-value
## (Intercept)  0.16293933 0.01329500 67 12.255688 0.0000
## twinnesstwin 0.06520431 0.02208731 67  2.952117 0.0043
## Correlation:
##              (Intr)
## twinnesstwin -0.602
##
## Standardized Within-Group Residuals:
##      Min      Q1      Med      Q3      Max
## -0.97171275 -0.25980282  0.00227864  0.26376166  0.72899245
##
## Number of Observations: 69
## Number of Groups: 69

#SOMA
SOMA<-stroop.tbl[which(stroop.tbl$parcel.set=="SOMA"),];
modelSOMA<-lme(fixed=similarity~twinness,
  random=list(pair.id=~1), data=SOMA,na.action=na.omit);
summary(modelSOMA)

## Linear mixed-effects model fit by REML
## Data: SOMA
##      AIC      BIC  logLik
## -125.082 -116.2632 66.541
##
## Random effects:
## Formula: ~1 | pair.id

```



```

##      (Intercept)  Residual
## StdDev:  0.07964806 0.02986802
##
## Fixed effects: similarity ~ twinness
##              Value Std.Error DF   t-value p-value
## (Intercept)  0.3643525 0.01282391 67 28.411976  0.0000
## twinnesstwin 0.0700209 0.02130467 67  3.286647  0.0016
## Correlation:
##              (Intr)
## twinnesstwin -0.602
##
## Standardized Within-Group Residuals:
##              Min      Q1      Med      Q3      Max
## -0.73868409 -0.21054018 -0.01581984  0.24143702  0.98950687
##
## Number of Observations: 69
## Number of Groups: 69

```

Figure S2: Means of Similarity Scores of High Control Demand Trials by Tasks

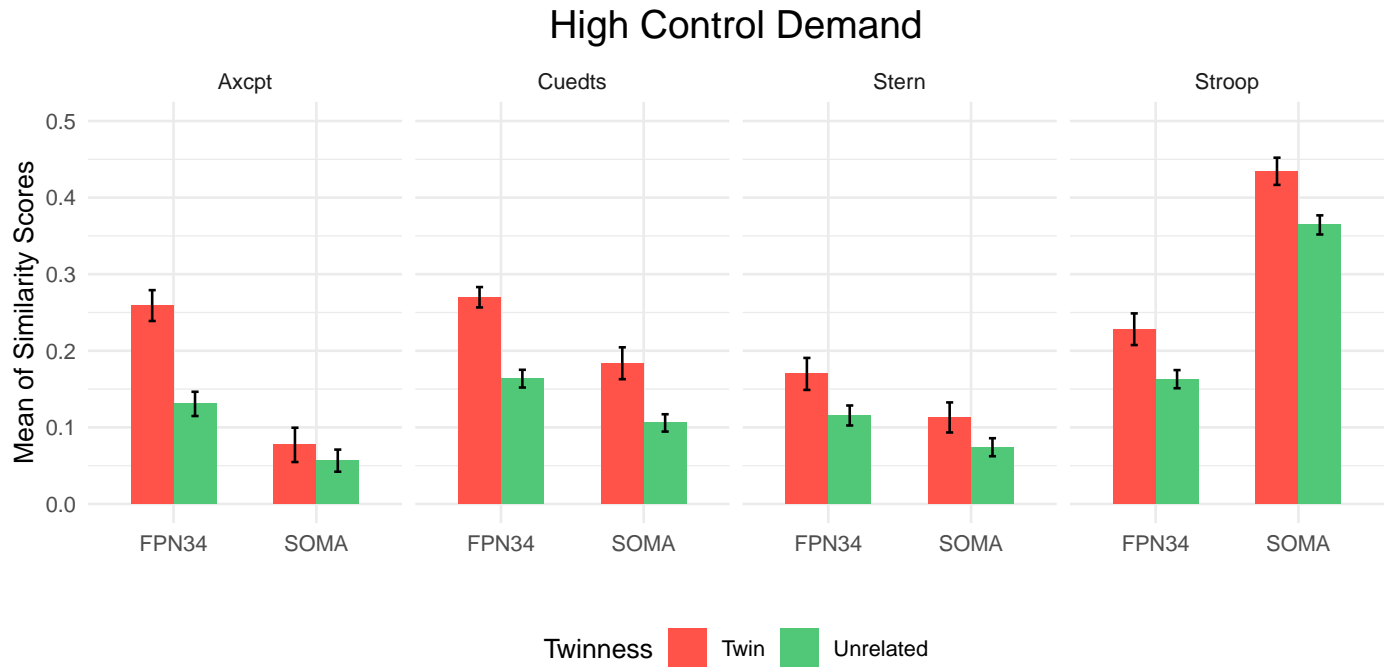

## Timecourse Analyses

Target knot: AX-CPT - 4, CuedTS - 4, Sternberg - 6, Stroop - 2.

Figure S3: Temporal Dynamics of Difference in Pattern Similarity (Twin greater than Unrelated) in High Control Demand Trials

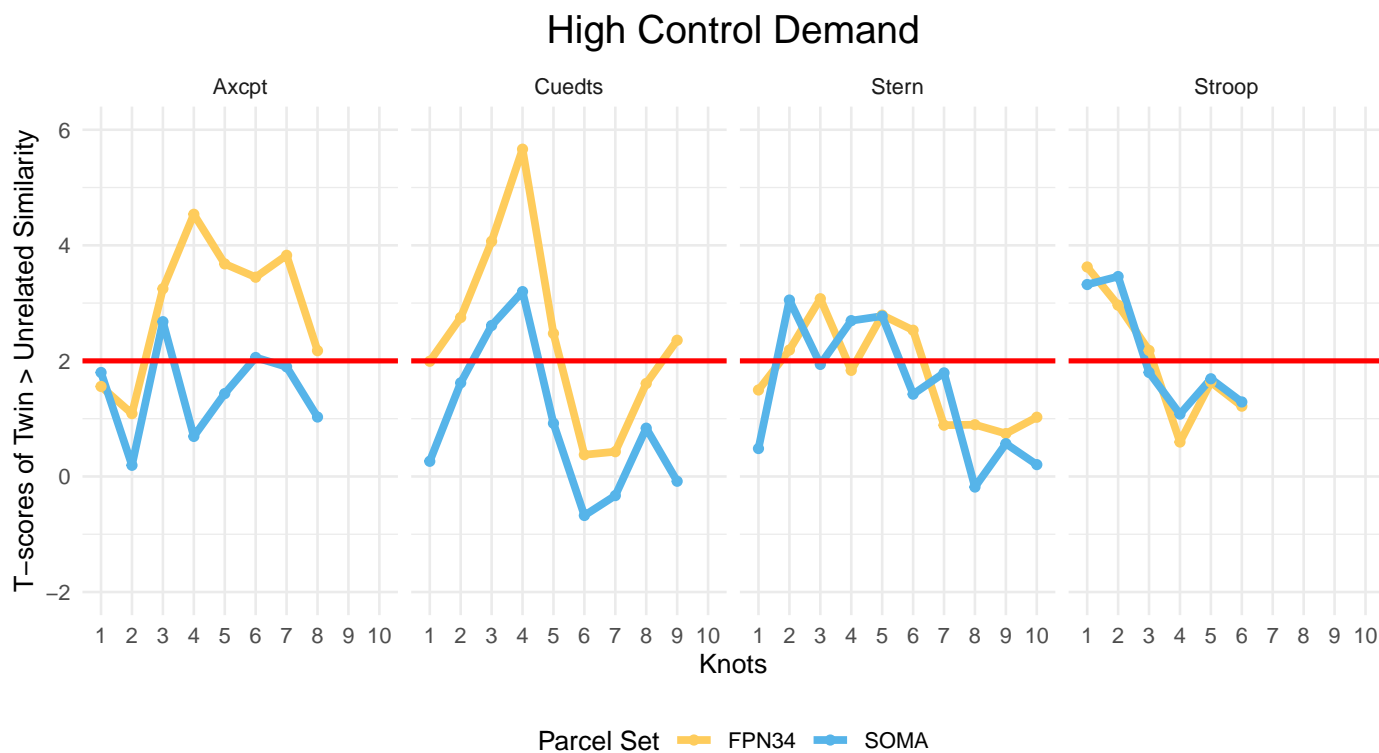

## S.8.1 Cross-task Twin Similarity Analyses (FPN vs. SOMA)

### Linear Mixed Model: Cross-task Twin Similarity

LMM setup and tests of main effects and interaction.

```
## high control
head(high.tbl)# show dataframe structure

##   twinness parcel.set similarity pair.id
## 1     Twin     FPN34  0.1514107      1
## 2     Twin     FPN34  0.1865529      2
## 3     Twin     FPN34  0.1288416      3
## 4     Twin     FPN34  0.1480226      4
## 5     Twin     FPN34         NA      5
## 6     Twin     FPN34         NA      6

##LMM
modelhigh<-lme(fixed=similarity~twinness*parcel.set,
               random=list(pair.id=~1), data=high.tbl,na.action=na.omit);
anova(modelhigh)

##                numDF denDF  F-value p-value
## (Intercept)          1    53 377.4074 <.0001
## twinness             1    53  24.3404 <.0001
## parcel.set           1    51 196.5124 <.0001
## twinness:parcel.set  1    51   6.6820  0.0126
```

A significant interaction effect was detected, follow-up with post-hoc contrasts.

```
# post-hocb tests, correct for multiple comparisons
a<-pairs(lsmmeans(modelhigh, ~ twinness | parcel.set))
b<-pairs(lsmmeans(modelhigh, ~ parcel.set | twinness))
rbind(a, b, adjust="tukey")

## parcel.set twinness contrast      estimate      SE df t.ratio p.value
## FPN34      .          Twin - Unrelated  0.0568 0.01043 53  5.442 <.0001
## SOMA      .          Twin - Unrelated  0.0232 0.01064 51  2.185  0.1044
## .         Twin      FPN34 - SOMA      0.1090 0.01022 51 10.667 <.0001
## .         Unrelated FPN34 - SOMA      0.0755 0.00799 51  9.456 <.0001
##
## Degrees-of-freedom method: containment
## P value adjustment: tukey method for comparing a family of 3.372 estimates
```

Figure S4: Mean (and Standard Error of the Mean) of Cross-task Similarity Scores in High Control Demand Trials

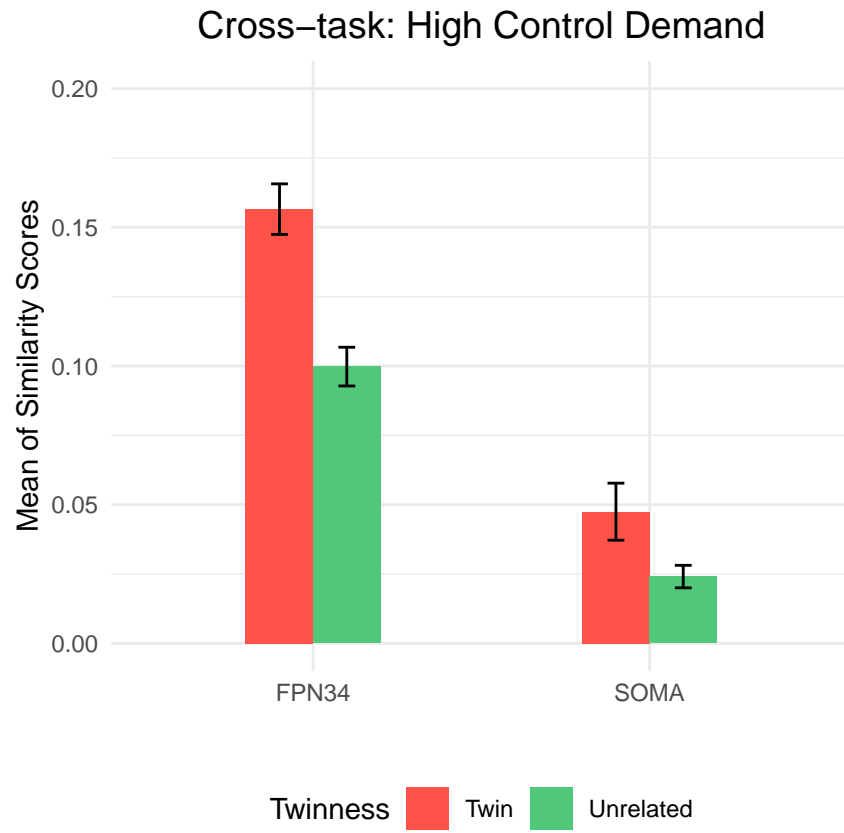

## S.9 High-Low Control Contrast (FPN vs. SOMA): Linear Mixed Model

LMM setup and tests of main effects and interaction.

```
## high-low control contrast
head(highlow.tbl)# show dataframe structure

##   task control parcel.set pair.id twinness similarity
## 1 Axcpt high-low   FPN34     1    twin 0.22192699
## 2 Axcpt high-low   FPN34     2    twin 0.22422743
## 3 Axcpt high-low   FPN34     3    twin 0.27727240
## 4 Axcpt high-low   FPN34     4    twin 0.09489604
## 5 Axcpt high-low   FPN34     5    twin          NA
## 6 Axcpt high-low   FPN34     6    twin 0.19355016

#LMM
modelhighlow<-lme(fixed=similarity~twinness*parcel.set,
  random=list(pair.id=~1, task=~1), data=highlow.tbl,na.action=na.omit);
anova(modelhighlow)

##              numDF denDF   F-value p-value
## (Intercept)         1   276 137.87737 <.0001
## twinness            1    73   7.83842 0.0065
## parcel.set         1   276  67.60575 <.0001
## twinness:parcel.set 1   276  11.59102 0.0008
```

A significant interaction effect was detected, follow-up with post-hoc contrasts.

```
# post-hoc tests, correct for multiple comparisons
a<-pairs(lsmeans(modelhighlow, ~ twinness | parcel.set))
b<-pairs(lsmeans(modelhighlow, ~ parcel.set | twinness))
rbind(a, b, adjust="tukey")

## parcel.set twinness contrast      estimate      SE df t.ratio p.value
## SOMA      .      unrelated - twin -0.000617 0.01071 73 -0.058 0.9995
## FPN34     .      unrelated - twin -0.046190 0.01071 73 -4.313 0.0002
## .         unrelated SOMA - FPN34  -0.036209 0.00819 276 -4.423 0.0001
## .         twin     SOMA - FPN34  -0.081783 0.01059 276 -7.723 <.0001
##
## Degrees-of-freedom method: containment
## P value adjustment: tukey method for comparing a family of 3.372 estimates
```

Figure S1: Means of Similarity Scores of High-Low Control Demand Contrast

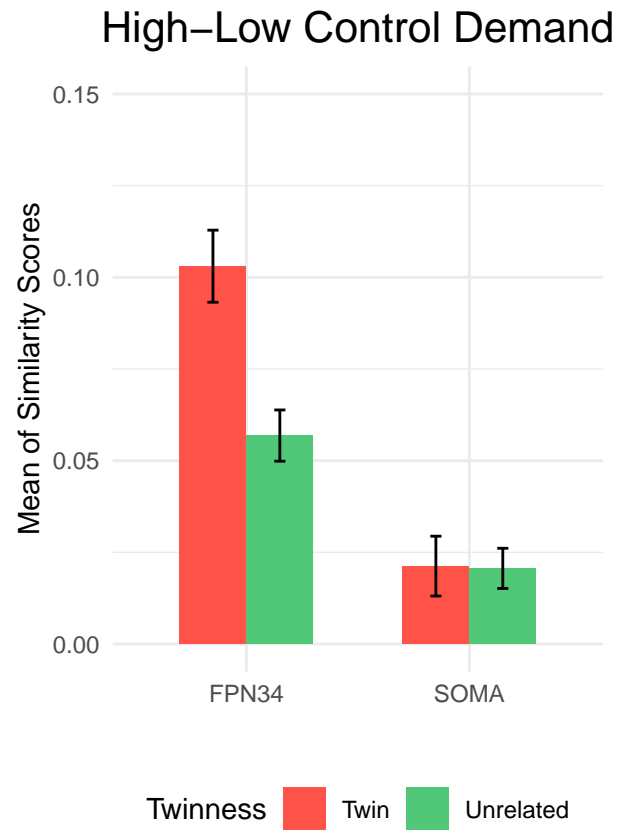

## Linear Mixed Model by Task

### AX-CPT

```
## high control
head(axcpt.tbl)# show dataframe structure

##   task control parcel.set pair.id twinness similarity
## 1 Axcpt high-low   FPN34      1   twin 0.22192699
## 2 Axcpt high-low   FPN34      2   twin 0.22422743
## 3 Axcpt high-low   FPN34      3   twin 0.27727240
## 4 Axcpt high-low   FPN34      4   twin 0.09489604
## 5 Axcpt high-low   FPN34      5   twin      NA
## 6 Axcpt high-low   FPN34      6   twin 0.19355016

##LMM
modelax<-lme(fixed=similarity~twinness*parcel.set,
             random=list(pair.id=~1), data=axcpt.tbl,na.action=na.omit);
anova(modelax)

##               numDF denDF  F-value p-value
## (Intercept)         1    66 95.52929 <.0001
## twinness             1    66  5.99310 0.0170
## parcel.set           1    66 88.77291 <.0001
## twinness:parcel.set  1    66 17.44160 0.0001
```

A significant interaction effect was detected, follow-up with post-hoc contrasts.

```
# post-hoc tests, correct for multiple comparisons
a<-pairs(lsmeans(modelax, ~ twinness | parcel.set))
b<-pairs(lsmeans(modelax, ~ parcel.set | twinness))
rbind(a, b, adjust="tukey")

## parcel.set twinness contrast      estimate      SE df t.ratio p.value
## SOMA      .      unrelated - twin   0.0165 0.0200 66  0.829 0.7553
## FPN34     .      unrelated - twin  -0.0912 0.0200 66 -4.567 0.0001
## .         .      unrelated SOMA - FPN34 -0.0769 0.0159 66 -4.822 <.0001
## .         .      twin      SOMA - FPN34 -0.1846 0.0203 66 -9.108 <.0001
##
## Degrees-of-freedom method: containment
## P value adjustment: tukey method for comparing a family of 3.372 estimates
```

### Cued-TS

```
## high control
head(cuedts.tbl)# show dataframe structure

##   task control parcel.set pair.id twinness similarity
## 110 Cuedts high-low   FPN34      1   twin -0.01092737
## 210 Cuedts high-low   FPN34      2   twin -0.01508454
## 310 Cuedts high-low   FPN34      3   twin -0.01431027
## 410 Cuedts high-low   FPN34      4   twin  0.07565474
## 510 Cuedts high-low   FPN34      5   twin  0.03674998
## 610 Cuedts high-low   FPN34      6   twin  0.02490381

##LMM
modelc<-lme(fixed=similarity~twinness*parcel.set,
            random=list(pair.id=~1), data=cuedts.tbl,na.action=na.omit);
anova(modelc)
```



|                        | numDF | denDF | F-value   | p-value |
|------------------------|-------|-------|-----------|---------|
| ## (Intercept)         | 1     | 73    | 0.4144325 | 0.5217  |
| ## twinness            | 1     | 73    | 2.2985697 | 0.1338  |
| ## parcel.set          | 1     | 73    | 0.2713249 | 0.6040  |
| ## twinness:parcel.set | 1     | 73    | 1.8630504 | 0.1765  |

A significant interaction effect was not detected, suggesting the effect of twinness was similar in both parcel sets. Nevertheless, we conducted separate linear mixed models to investigate the twinness effect within each parcel set, which found twins to be greater than unrelated in pattern similarity in FPN34 but not SOMA.

```

#LMM
#FPN34
FPN34<-cuedts.tbl[which(cuedts.tbl$parcel.set=="FPN34"),];
modelfnp34<-lme(fixed=similarity~twinness,
               random=list(pair.id~1), data=FPN34,na.action=na.omit);
summary(modelfnp34)

## Linear mixed-effects model fit by REML
## Data: FPN34
##      AIC      BIC logLik
## -165.86 -156.6982  86.93
##
## Random effects:
## Formula: ~1 | pair.id
##      (Intercept)  Residual
## StdDev:  0.06556306 0.02458615
##
## Fixed effects: similarity ~ twinness
##              Value Std.Error DF   t-value p-value
## (Intercept) -0.00655381 0.01021367 73  -0.641671  0.5231
## twinness     0.03718724 0.01671604 73   2.224644  0.0292
## Correlation:
##      (Intr)
## twinness -0.611
##
## Standardized Within-Group Residuals:
##      Min      Q1      Med      Q3      Max
## -1.11796735 -0.20742430  0.03067154  0.20286372  0.90541617
##
## Number of Observations: 75
## Number of Groups: 75

#SOMA
SOMA<-cuedts.tbl[which(cuedts.tbl$parcel.set=="SOMA"),];
modelSOMA<-lme(fixed=similarity~twinness,
               random=list(pair.id~1), data=SOMA,na.action=na.omit);
summary(modelSOMA)

## Linear mixed-effects model fit by REML
## Data: SOMA
##      AIC      BIC logLik
## -141.211 -132.0492  74.6055
##
## Random effects:
## Formula: ~1 | pair.id
##      (Intercept)  Residual
## StdDev:  0.07762125 0.02910799
##
## Fixed effects: similarity ~ twinness
##              Value Std.Error DF   t-value p-value
## (Intercept) -0.000959378 0.01209214 73  -0.0793390  0.937

```

```
## twinnesstwin 0.007547396 0.01979041 73 0.3813664 0.704
## Correlation:
## (Intr)
## twinnesstwin -0.611
##
## Standardized Within-Group Residuals:
## Min Q1 Med Q3 Max
## -1.13226203 -0.20241626 0.02582711 0.17028844 0.89314363
##
## Number of Observations: 75
## Number of Groups: 75
```

## Sternberg

```
## high control
head(stern.tbl)# show dataframe structure

## task control parcel.set pair.id twinness similarity
## 112 Stern high-low FPN34 1 twin 0.071160403
## 212 Stern high-low FPN34 2 twin -0.002437876
## 312 Stern high-low FPN34 3 twin -0.016845013
## 412 Stern high-low FPN34 4 twin 0.028872827
## 512 Stern high-low FPN34 5 twin -0.006765266
## 612 Stern high-low FPN34 6 twin NA

##LMM
modelst<-lme(fixed=similarity~twinness*parcel.set,
             random=list(pair.id=~1), data=stern.tbl,na.action=na.omit);
anova(modelst)

## numDF denDF F-value p-value
## (Intercept) 1 64 18.805525 0.0001
## twinness 1 64 0.006445 0.9363
## parcel.set 1 64 1.340225 0.2513
## twinness:parcel.set 1 64 0.858732 0.3576
```

A significant interaction effect was not detected, suggesting the effect of twinness was similar in both parcel sets. Nevertheless, we conducted separate linear mixed models to investigate the twinness effect within each parcel set, which found twins to be numerically greater than unrelated in pattern similarity in FPN34 but not SOMA.

```
##LMM
##FPN34
FPN34<-stern.tbl[which(stern.tbl$parcel.set=="FPN34"),];
modelfpn34<-lme(fixed=similarity~twinness,
                random=list(pair.id=~1), data=FPN34,na.action=na.omit);
summary(modelfpn34)

## Linear mixed-effects model fit by REML
## Data: FPN34
## AIC BIC logLik
## -132.564 -123.9284 70.28199
##
## Random effects:
## Formula: ~1 | pair.id
## (Intercept) Residual
## StdDev: 0.07157263 0.02683975
##
## Fixed effects: similarity ~ twinness
```

```

##           Value Std.Error DF   t-value p-value
## (Intercept) 0.02903827 0.01193786 64 2.4324513 0.0178
## twinnesstwin 0.01166911 0.01939673 64 0.6016021 0.5496
## Correlation:
##           (Intr)
## twinnesstwin -0.615
##
## Standardized Within-Group Residuals:
##           Min           Q1           Med           Q3           Max
## -0.85144692 -0.17858105 -0.02150301 0.22226323 0.82060541
##
## Number of Observations: 66
## Number of Groups: 66

#SOMA
SOMA<-stern.tbl[which(stern.tbl$parcel.set=="SOMA"),];
modelSOMA<-lme(fixed=similarity~twinness,
  random=list(pair.id=~1), data=SOMA,na.action=na.omit);
summary(modelSOMA)

## Linear mixed-effects model fit by REML
## Data: SOMA
##           AIC           BIC      logLik
## -167.7507 -159.1152 87.87536
##
## Random effects:
## Formula: ~1 | pair.id
##           (Intercept) Residual
## StdDev:    0.0543702 0.02038883
##
## Fixed effects: similarity ~ twinness
##           Value Std.Error DF   t-value p-value
## (Intercept) 0.024203843 0.009068605 64 2.6689710 0.0096
## twinnesstwin -0.009607314 0.014734739 64 -0.6520179 0.5167
## Correlation:
##           (Intr)
## twinnesstwin -0.615
##
## Standardized Within-Group Residuals:
##           Min           Q1           Med           Q3           Max
## -0.64869038 -0.23403145 -0.02622715 0.23413728 0.98687773
##
## Number of Observations: 66
## Number of Groups: 66

```

## Stroop

```

## high control
head(stroop.tbl)# show dataframe structure

##           task control parcel.set pair.id twinness similarity
## 114 Stroop high-low      FPN34      1      twin 0.09222377
## 214 Stroop high-low      FPN34      2      twin 0.10709531
## 314 Stroop high-low      FPN34      3      twin 0.11660831
## 414 Stroop high-low      FPN34      4      twin 0.05962269
## 514 Stroop high-low      FPN34      5      twin 0.14659129
## 614 Stroop high-low      FPN34      6      twin 0.10822541

#LMM

```

```

modelstro<-lme(fixed=similarity~twinness*parcel.set,
  random=list(pair.id=~1), data=stroop.tbl,na.action=na.omit);
anova(modelstro)

##              numDF denDF  F-value p-value
## (Intercept)         1    67 163.50350 <.0001
## twinness           1    67   5.44075 0.0227
## parcel.set         1    67  42.80105 <.0001
## twinness:parcel.set 1    67   0.88621 0.3499

```

A significant interaction effect was not detected, suggesting the effect of twinness was similar in both parcel sets. Nevertheless, we conducted separate linear mixed models to investigate the twinness effect within each parcel set, which found twins to be greater than unrelated in pattern similarity in FPN34 but not SOMA.

```

#LMM
#FPN34
FPN34<-stroop.tbl[which(stroop.tbl$parcel.set=="FPN34"),];
modelfpn34<-lme(fixed=similarity~twinness,
  random=list(pair.id=~1), data=FPN34,na.action=na.omit);
summary(modelfpn34)

## Linear mixed-effects model fit by REML
## Data: FPN34
##      AIC      BIC   logLik
## -134.1663 -125.3475 71.08315
##
## Random effects:
## Formula: ~1 | pair.id
##      (Intercept)  Residual
## StdDev:  0.07442741 0.02791028
##
## Fixed effects: similarity ~ twinness
##              Value Std.Error DF  t-value p-value
## (Intercept)  0.11256618 0.01198334 67  9.393553  0.0000
## twinnesstwin 0.04581656 0.01990823 67  2.301388  0.0245
## Correlation:
##      (Intr)
## twinnesstwin -0.602
##
## Standardized Within-Group Residuals:
##      Min      Q1      Med      Q3      Max
## -0.86669674 -0.22155923  0.03806681  0.24063412  0.81330833
##
## Number of Observations: 69
## Number of Groups: 69

#SOMA
SOMA<-stroop.tbl[which(stroop.tbl$parcel.set=="SOMA"),];
modelSOMA<-lme(fixed=similarity~twinness,
  random=list(pair.id=~1), data=SOMA,na.action=na.omit);
summary(modelSOMA)

## Linear mixed-effects model fit by REML
## Data: SOMA
##      AIC      BIC   logLik
## -142.8922 -134.0735 75.44612
##
## Random effects:
## Formula: ~1 | pair.id
##      (Intercept)  Residual
## StdDev:  0.06973521 0.0261507

```

```
##
## Fixed effects: similarity ~ twinness
##           Value Std.Error DF  t-value p-value
## (Intercept) 0.04130912 0.01122787 67 3.679160 0.0005
## twinnesstwin 0.02188983 0.01865313 67 1.173521 0.2447
## Correlation:
##           (Intr)
## twinnesstwin -0.602
##
## Standardized Within-Group Residuals:
##           Min      Q1      Med      Q3      Max
## -0.93275835 -0.20831455 -0.02920394 0.14552634 0.88986996
##
## Number of Observations: 69
## Number of Groups: 69
```

Figure S2: Means of Similarity Scores of High-Low Control Demand Contrast by Tasks

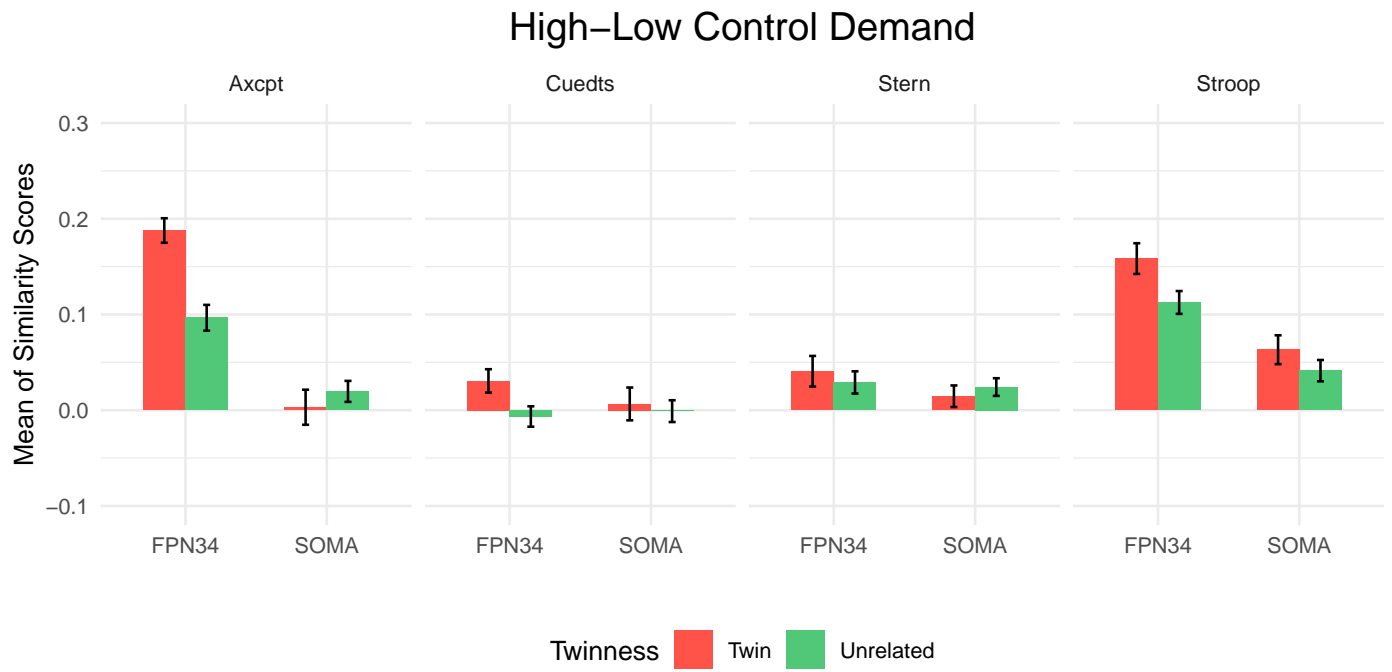

## Timecourse Analyses

Target knot: AX-CPT - 4, CuedTS - 4, Sternberg - 6, Stroop - 2.

Figure S3: Temporal Dynamics of Difference in Pattern Similarity (Twin greater than Unrelated) in High-Low Control Demand Contrast

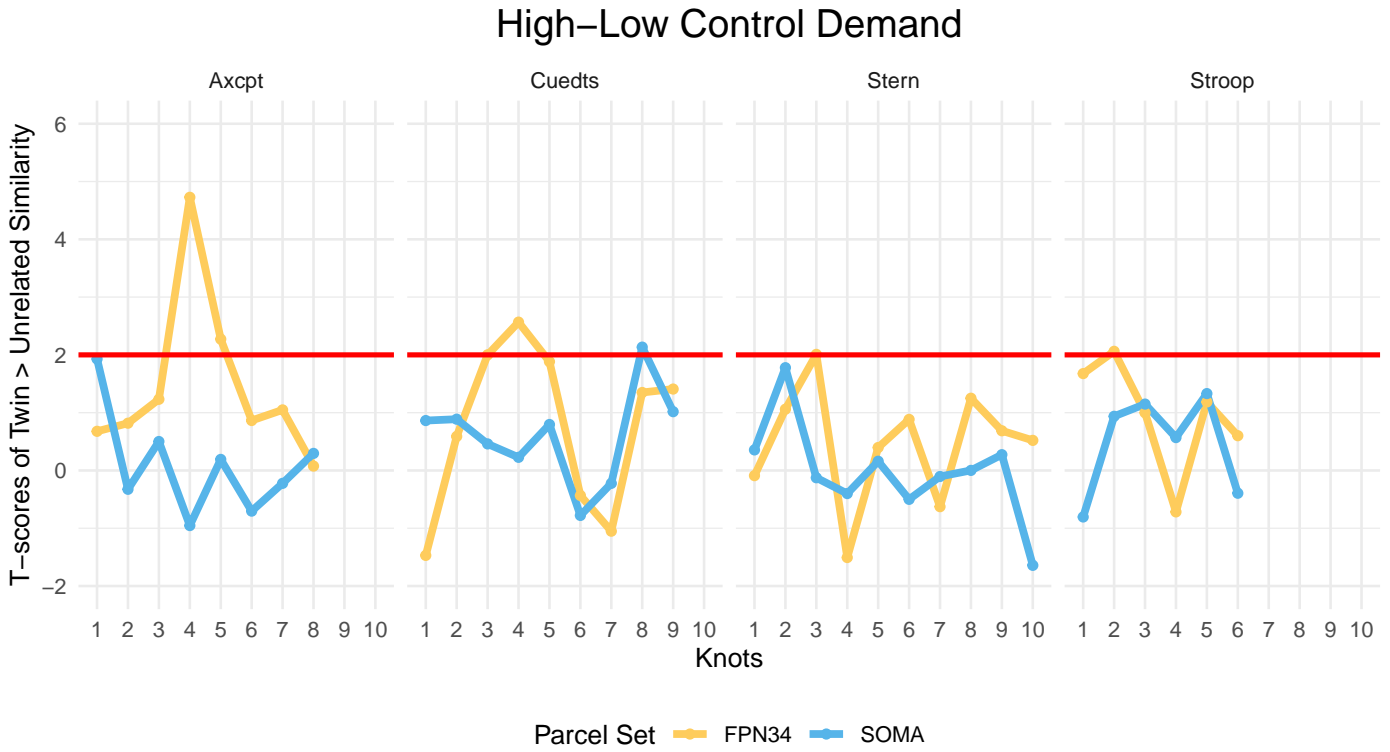

## S.9.1 Cross-task Twin Similarity Analyses (FPN vs. SOMA)

### Linear Mixed Model: Cross-task Twin Similarity

LMM setup and tests of main effects and interaction.

```
## high-low control
head(highlow.tbl)# show dataframe structure

##   twinness parcel.set  similarity pair.id
## 1     Twin     FPN34  0.06915955     1
## 2     Twin     FPN34  0.04661796     2
## 3     Twin     FPN34  0.06656048     3
## 4     Twin     FPN34 -0.01363391     4
## 5     Twin     FPN34          NA     5
## 6     Twin     FPN34          NA     6

modelhighlow<-lme(fixed=similarity~twinness*parcel.set,
                  random=list(pair.id=~1), data=highlow.tbl,na.action=na.omit);
anova(modelhighlow)

##              numDF denDF  F-value p-value
## (Intercept)         1   53 100.17220 <.0001
## twinness           1   53   9.60565  0.0031
## parcel.set         1   51  89.59749 <.0001
## twinness:parcel.set 1   51   1.21043  0.2764
```

A significant interaction effect was not detected, suggesting the effect of twinness was similar in both parcel sets. Nevertheless, we conducted separate linear mixed models to investigate the twinness effect within each parcel set, which found twins to be greater than unrelated in pattern similarity in FPN34 but also slightly in SOMA. However, we conducted a one-sample t-test to see if the similarity scores of unrelated pairs in the SOMA parcel set was statistically significant (greater than or less than zero). Not surprisingly, we did not detect a statistical significance, suggesting that although there was a statistical significant difference between unrelated and twins similarity scores in the SOMA parcel set, the difference was not meaningful.

```
# post-hocb tests, correct for multiple comparisons

#FPN34
FPN34<-highlow.tbl[which(highlow.tbl$parcel.set=="FPN34"),];
modelfpn34<-lme(fixed=similarity~twinness,
                random=list(pair.id=~1), data=FPN34,na.action=na.omit);
summary(modelfpn34)

## Linear mixed-effects model fit by REML
## Data: FPN34
##      AIC      BIC    logLik
## -190.6963 -182.8151 99.34816
##
## Random effects:
## Formula: ~1 | pair.id
##      (Intercept)  Residual
## StdDev:  0.03267289 0.01225233
##
## Fixed effects: similarity ~ twinness
##              Value Std.Error DF  t-value p-value
## (Intercept)  0.04178084 0.005984384 53 6.981644  0.000
## twinnessTwin 0.02267284 0.009684812 53 2.341072  0.023
## Correlation:
##      (Intr)
## twinnessTwin -0.618
```



```

##
## Standardized Within-Group Residuals:
##      Min      Q1      Med      Q3      Max
## -0.78574738 -0.26599147 -0.06519345  0.22040238  0.84434902
##
## Number of Observations: 55
## Number of Groups: 55

#SOMA
SOMA<-highlow.tbl[which(highlow.tbl$parcel.set=="SOMA"),];
modelSOMA<-lme(fixed=similarity~twinness,
              random=list(pair.id=~1), data=SOMA,na.action=na.omit);
summary(modelSOMA)

## Linear mixed-effects model fit by REML
## Data: SOMA
##      AIC      BIC  logLik
## -266.4745 -258.7472 137.2373
##
## Random effects:
## Formula: ~1 | pair.id
##      (Intercept)  Residual
## StdDev:  0.01441764 0.005406616
##
## Fixed effects: similarity ~ twinness
##              Value Std.Error DF   t-value p-value
## (Intercept) -0.00128371 0.002680456 51 -0.4789149  0.6340
## twinnessTwin  0.01141506 0.004363466 51  2.6160534  0.0117
## Correlation:
##      (Intr)
## twinnessTwin -0.614
##
## Standardized Within-Group Residuals:
##      Min      Q1      Med      Q3      Max
## -0.6581265 -0.2177218  0.0132187  0.1675449  1.2093107
##
## Number of Observations: 53
## Number of Groups: 53

# one- sample t-test
new<-SOMA[SOMA$twinness=="Unrelated",]
t.test(new$similarity, mu = 0, alternative = "two.sided")

##
## One Sample t-test
##
## data:  new$similarity
## t = -0.54422, df = 32, p-value = 0.5901
## alternative hypothesis: true mean is not equal to 0
## 95 percent confidence interval:
## -0.006088477  0.003521057
## sample estimates:
## mean of x
## -0.00128371

```

Figure S4: Mean (and Standard Error of the Mean) of Cross-task Similarity Scores in High-Low Control Demand Contrast

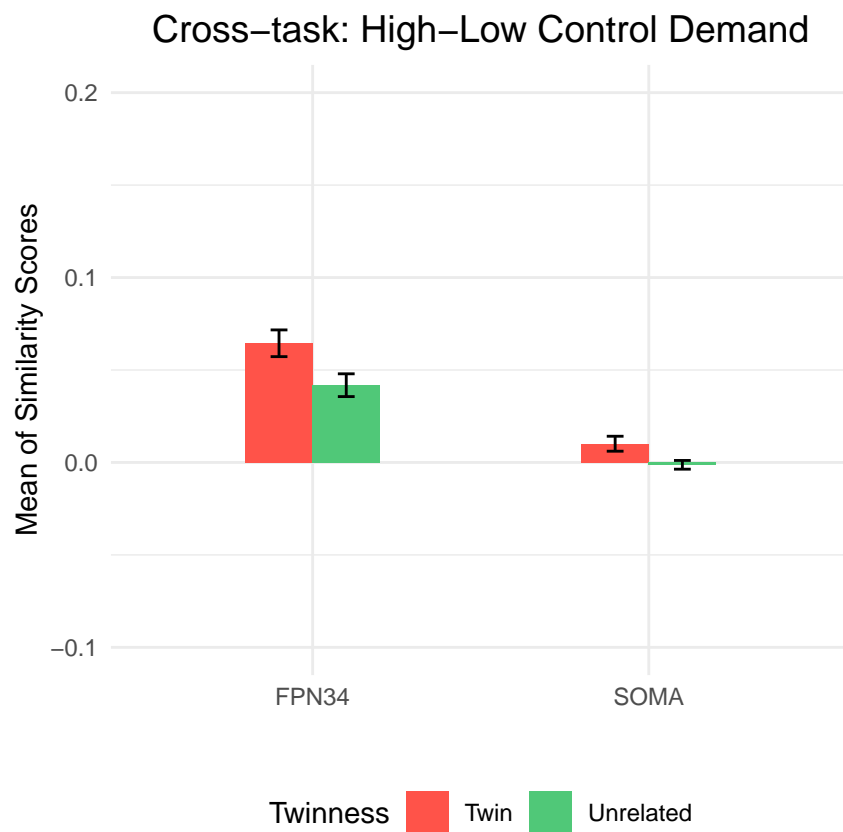

## S.10 Cross-task High-Low Control Contrast: Linear Mixed Model

LMM setup and tests of main effects and interaction.

```
## high control
head(highlow.tbl)# show dataframe structure

##  twinness parcel.set  similarity pair.id
## 1    Twin    FPN34  0.06915955    1
## 2    Twin    FPN34  0.04661796    2
## 3    Twin    FPN34  0.06656048    3
## 4    Twin    FPN34 -0.01363391    4
## 5    Twin    FPN34          NA     5
## 6    Twin    FPN34          NA     6

#LMM
modelhighlow<-lme(fixed=similarity~twinness*parcel.set,
                 random=list(pair.id=~1), data=highlow.tbl,na.action=na.omit);
anova(modelhighlow)

##              numDF denDF   F-value p-value
## (Intercept)         1    53 102.80212 <.0001
## twinness            1    53   5.06662  0.0286
## parcel.set          1    53  80.77735 <.0001
## twinness:parcel.set  1    53   3.70074  0.0598
```

A significant interaction effect was not detected, suggesting the effect of twinness was similar in both parcel sets. Nevertheless, we conducted separate linear mixed models to investigate the twinness effect within each parcel set, which found twins to be greater than unrelated in pattern similarity in FPN34 but not NULL34.

```
#FPN34
FPN34<-highlow.tbl[which(highlow.tbl$parcel.set=="FPN34"),];
modelfnp34<-lme(fixed=similarity~twinness,
               random=list(pair.id=~1), data=FPN34,na.action=na.omit);
summary(modelfnp34)

## Linear mixed-effects model fit by REML
## Data: FPN34
##      AIC      BIC    logLik
## -190.6963 -182.8151 99.34816
##
## Random effects:
## Formula: ~1 | pair.id
##      (Intercept)  Residual
## StdDev:  0.03267289 0.01225233
##
## Fixed effects: similarity ~ twinness
##              Value  Std.Error DF  t-value p-value
## (Intercept)  0.04178084 0.005984384 53  6.981644  0.000
## twinnessTwin 0.02267284 0.009684812 53  2.341072  0.023
## Correlation:
##      (Intr)
## twinnessTwin -0.618
##
## Standardized Within-Group Residuals:
##      Min      Q1      Med      Q3      Max
## -0.78574738 -0.26599147 -0.06519345  0.22040238  0.84434902
##
## Number of Observations: 55
## Number of Groups: 55

#NULL34
```

```

NULL34<-highlow.tbl[which(highlow.tbl$parcel.set=="NULL34"),];
modelNULL34<-lme(fixed=similarity~twinness,
                 random=list(pair.id=~1), data=NULL34,na.action=na.omit);
summary(modelNULL34)

## Linear mixed-effects model fit by REML
## Data: NULL34
##      AIC      BIC   logLik
## -263.5772 -255.696 135.7886
##
## Random effects:
## Formula: ~1 | pair.id
##      (Intercept)   Residual
## StdDev:  0.01642805 0.006160514
##
## Fixed effects: similarity ~ twinness
##              Value  Std.Error DF   t-value p-value
## (Intercept)  0.003723423 0.003008971 53  1.2374404  0.2214
## twinnessTwin 0.002515092 0.004869560 53  0.5164926  0.6077
## Correlation:
##              (Intr)
## twinnessTwin -0.618
##
## Standardized Within-Group Residuals:
##      Min      Q1      Med      Q3      Max
## -0.783123268 -0.241948998 -0.000522601  0.200125098  0.929234203
##
## Number of Observations: 55
## Number of Groups: 55

```

## S.11 Correlation of Functional Similarity and Anatomic Similarity Scores

Correlating each pair's functional similarity scores with its anatomic similarity scores, expecting no meaningful correlations for twin pairs.

### High Control

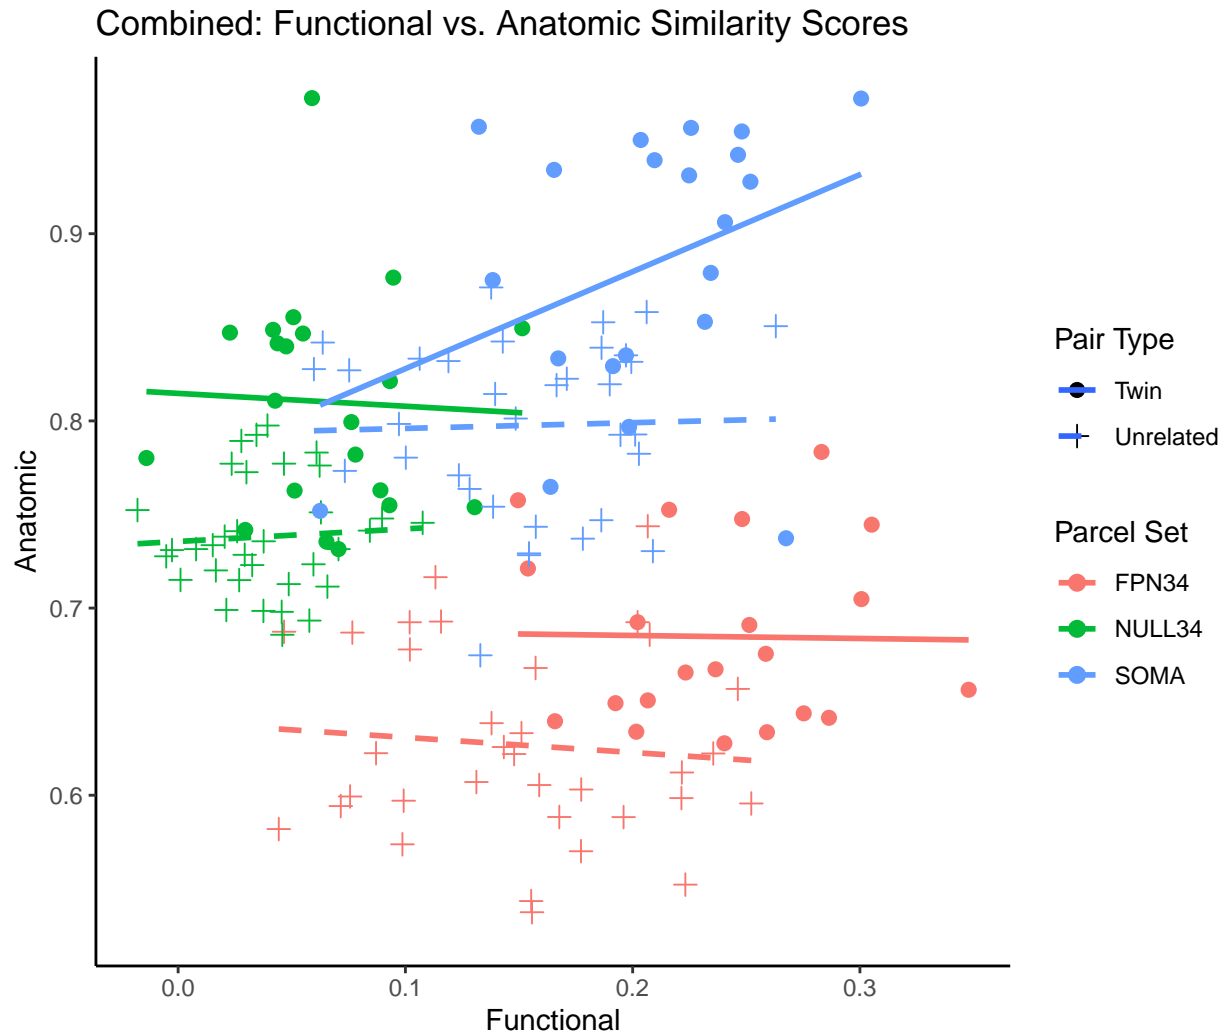

### FPN34: High Control

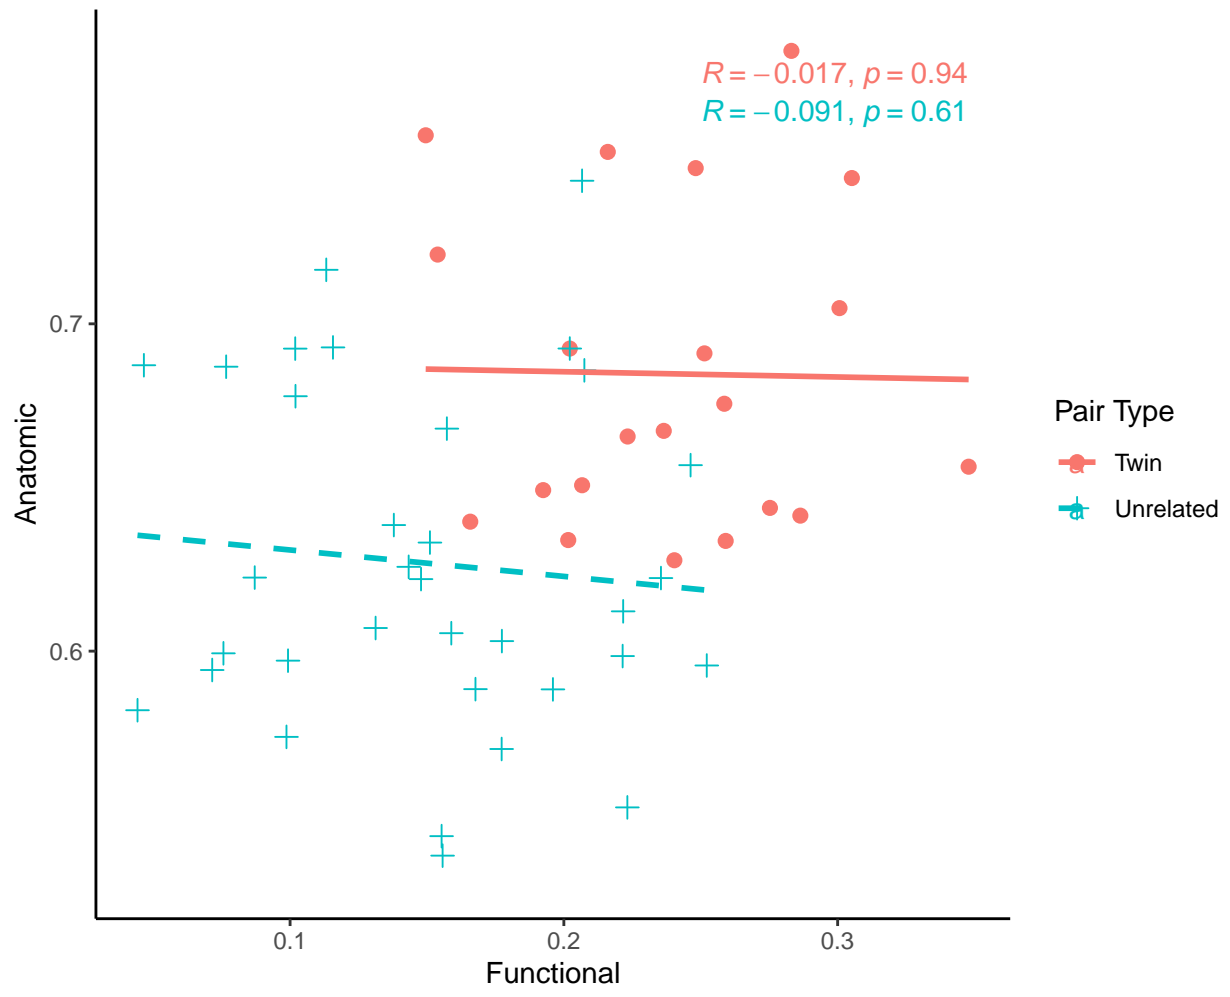

### NULL34: High Control

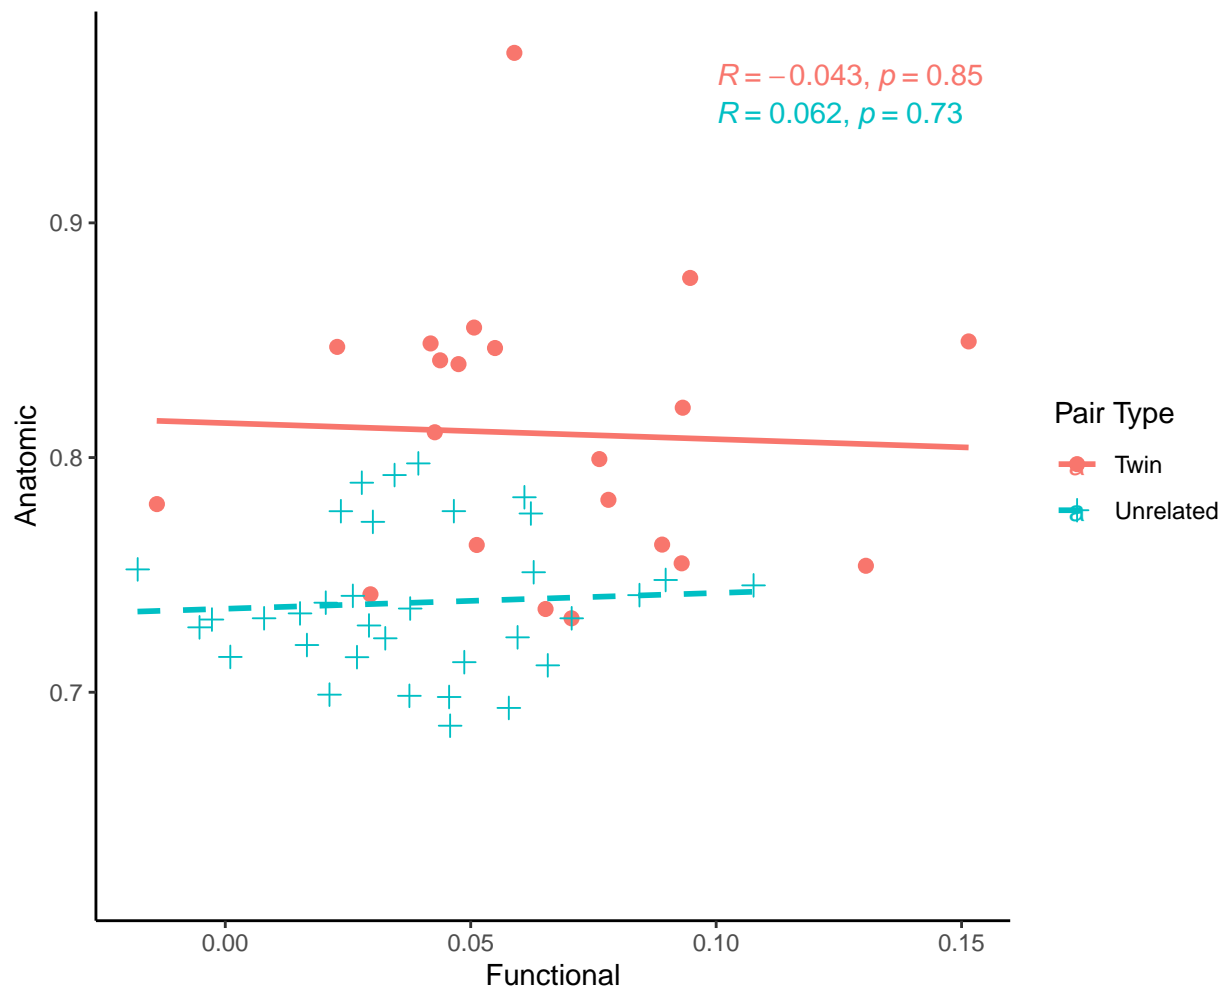

# SOMA: High Control

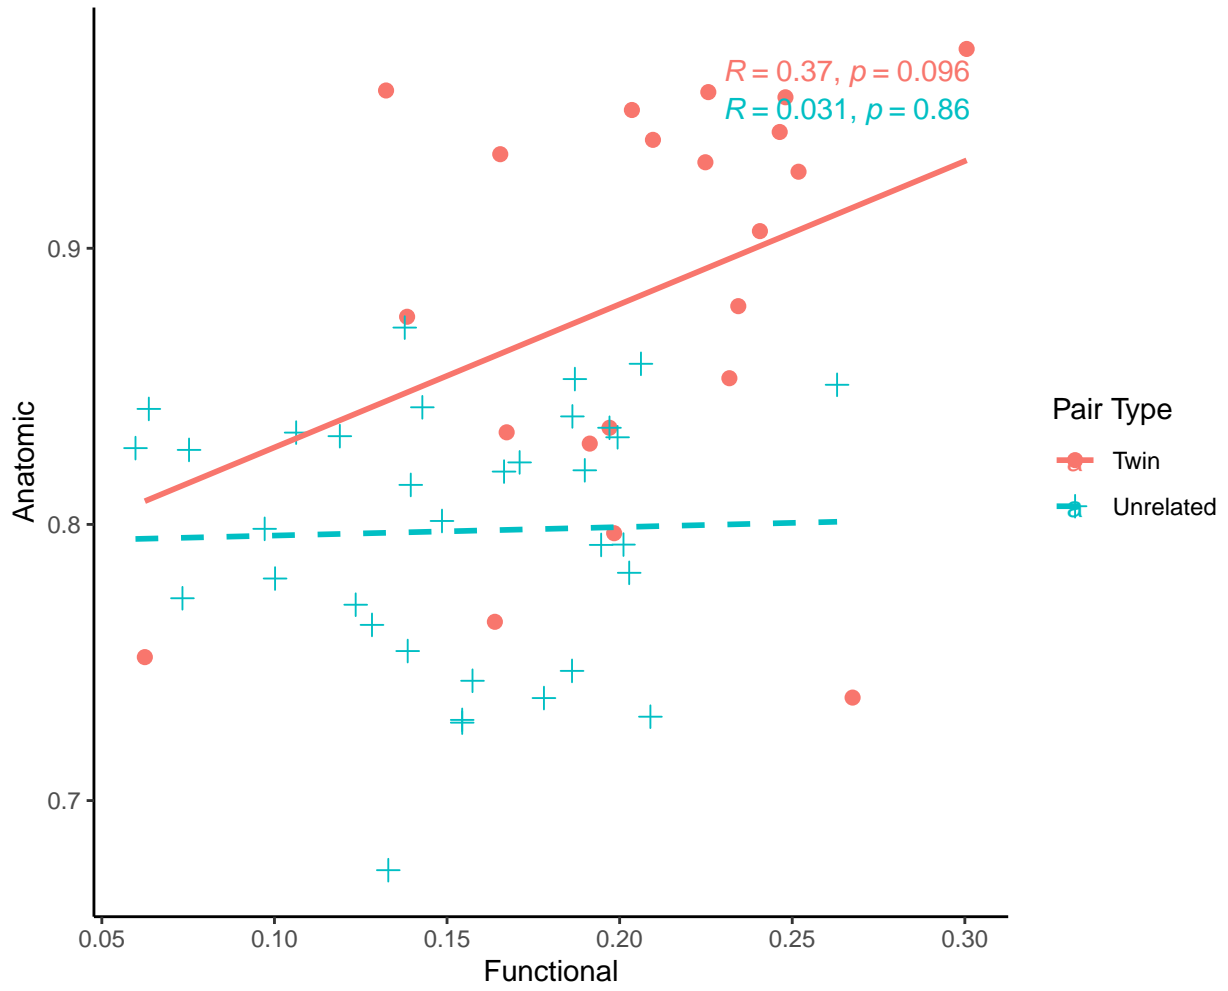



# High-Low Control

## Combined: Functional vs. Anatomic Similarity Scores

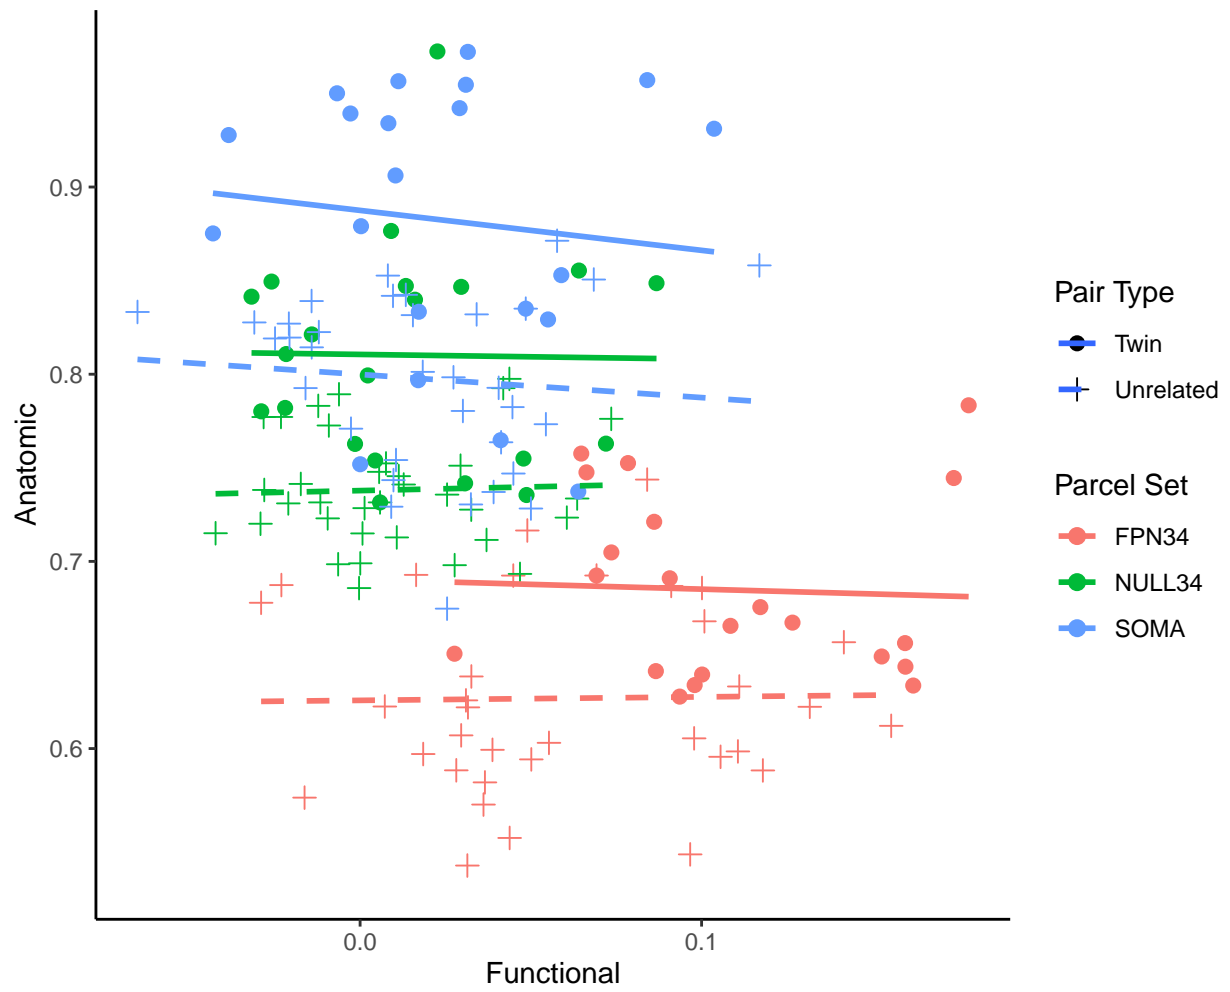

### FPN34: High-Low Control

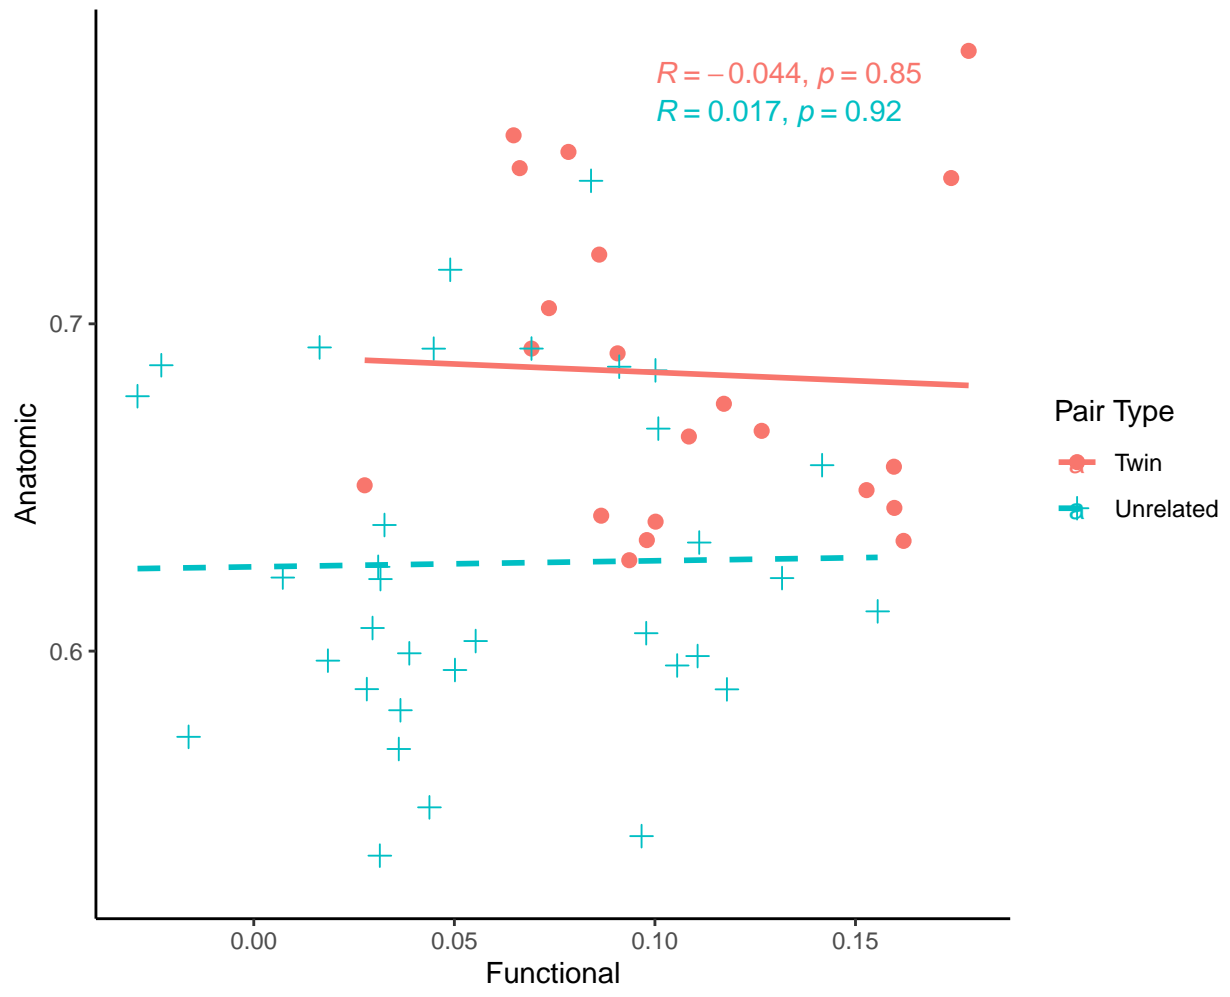

# NULL34: High-Low Control

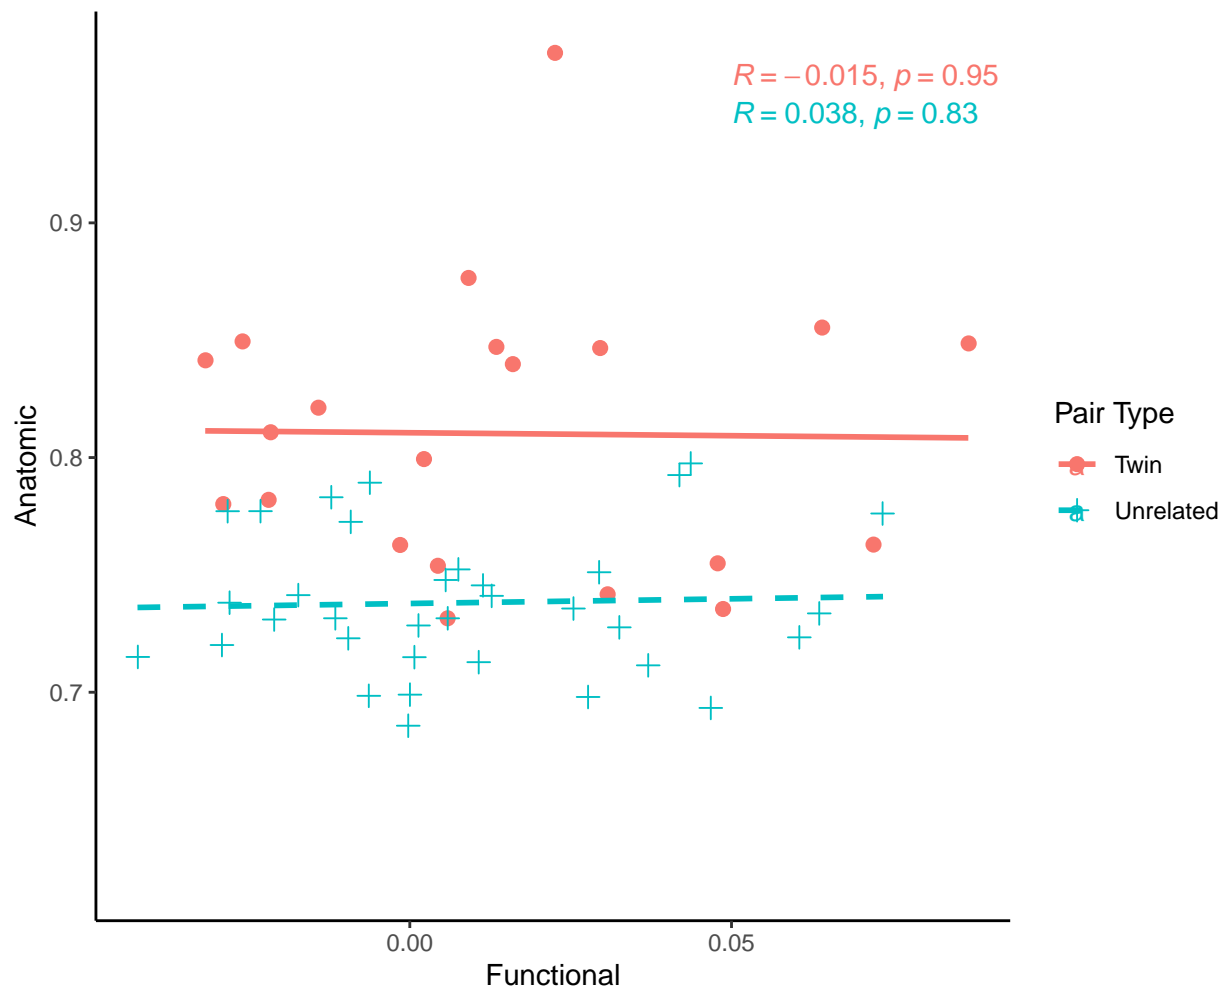

### SOMA: High-Low Control

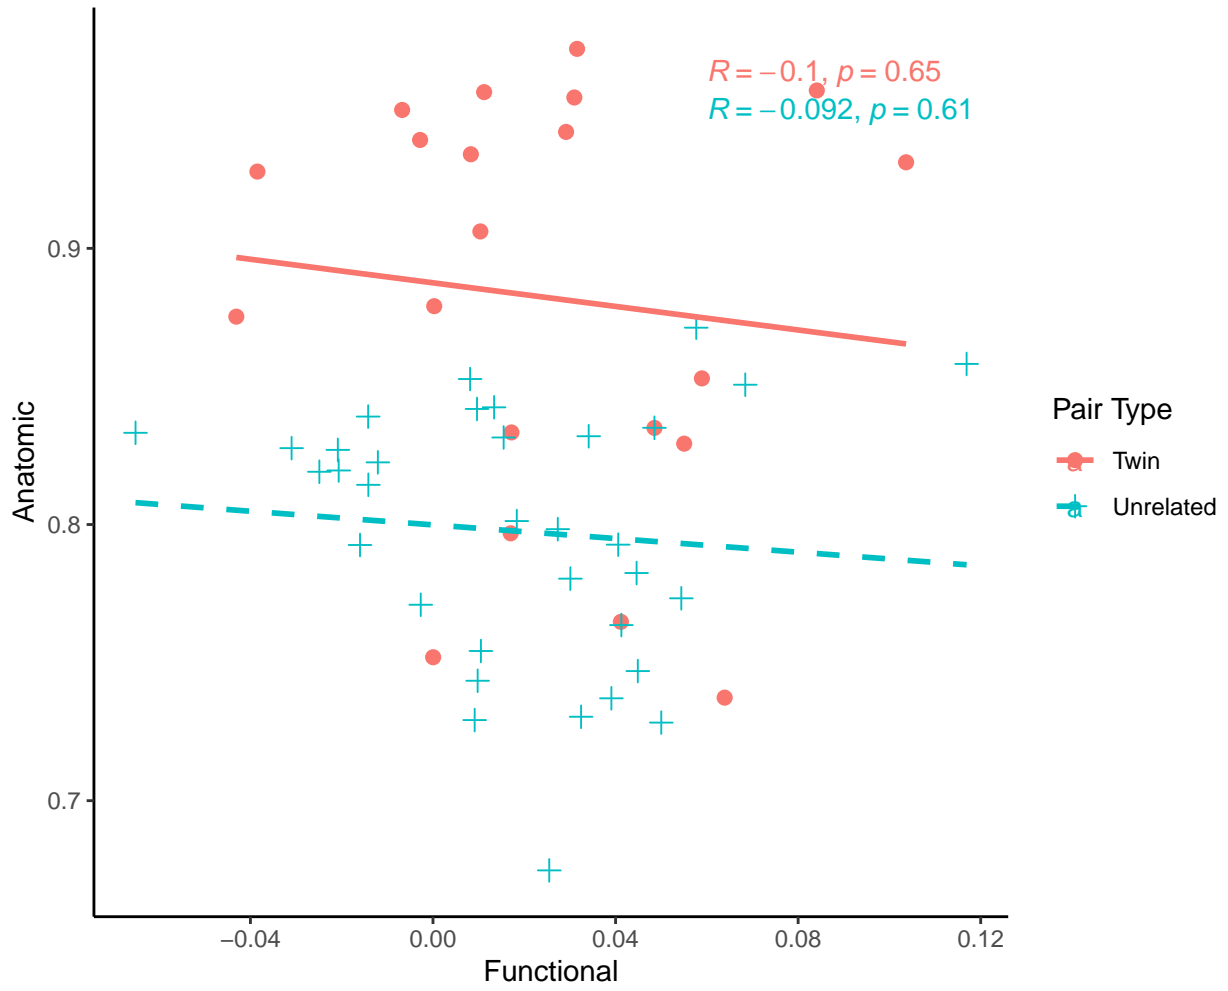

Supplement: NIHMS1779622-supplement-supplementary_files.pdf [file NIHMS1779622-supplement-supplementary_files.pdf]
